# Supplementary material for: Patient perspectives on the HIV continuum of care in London: a qualitative study of people diagnosed between 1986 and 2014
Source: PubMed Central journal article supplement (PMC5884332; doi:10.1136/bmjopen-2017-020208), 2018-03-30
Supplement: bmjopen-2017-020208.draft_revisions.pdf [file bmjopen-2017-020208.draft_revisions.pdf]

# BMJ Open

BMJ Open is committed to open peer review. As part of this commitment we make the peer review history of every article we publish publicly available.

When an article is published we post the peer reviewers' comments and the authors' responses online. We also post the versions of the paper that were used during peer review. These are the versions that the peer review comments apply to.

The versions of the paper that follow are the versions that were submitted during the peer review process. They are not the versions of record or the final published versions. They should not be cited or distributed as the published version of this manuscript.

BMJ Open is an open access journal and the full, final, typeset and author-corrected version of record of the manuscript is available on our site with no access controls, subscription charges or pay-per-view fees (<http://bmjopen.bmj.com>).

If you have any questions on BMJ Open's open peer review process please email [info.bmjopen@bmj.com](mailto:info.bmjopen@bmj.com)

# BMJ Open

## Patient perspectives on the HIV continuum of care in London: a qualitative study of people diagnosed between 1986 and 2014

|                                 |                                                                                                                                                                                                                                                                                                                                                                                           |
|---------------------------------|-------------------------------------------------------------------------------------------------------------------------------------------------------------------------------------------------------------------------------------------------------------------------------------------------------------------------------------------------------------------------------------------|
| Journal:                        | <i>BMJ Open</i>                                                                                                                                                                                                                                                                                                                                                                           |
| Manuscript ID                   | bmjopen-2017-020208                                                                                                                                                                                                                                                                                                                                                                       |
| Article Type:                   | Research                                                                                                                                                                                                                                                                                                                                                                                  |
| Date Submitted by the Author:   | 31-Oct-2017                                                                                                                                                                                                                                                                                                                                                                               |
| Complete List of Authors:       | Bruton, Jane; Imperial College London, Department of Infectious Disease Epidemiology<br>Rai, Tanvi; Imperial College London, Department of Infectious Disease Epidemiology<br>Day, Sophie; Imperial College London, Department of Infectious Disease Epidemiology; Goldsmiths University of London, Anthropology<br>Ward, Helen; Imperial College London, Infectious Disease Epidemiology |
| <b>Primary Subject Heading</b>: | HIV/AIDS                                                                                                                                                                                                                                                                                                                                                                                  |
| Secondary Subject Heading:      | Qualitative research, Health services research, Patient-centred medicine                                                                                                                                                                                                                                                                                                                  |
| Keywords:                       | HIV & AIDS < INFECTIOUS DISEASES, QUALITATIVE RESEARCH, PATIENT EXPERIENCE, HIV CARE CONTINUUM                                                                                                                                                                                                                                                                                            |
|                                 |                                                                                                                                                                                                                                                                                                                                                                                           |

SCHOLARONE™  
Manuscripts

Only

1  
2  
3  
4  
5  
6 **Patient perspectives on the HIV continuum of care in London: a**  
7 **qualitative study of people diagnosed between 1986 and 2014**  
8  
9

10  
11  
12 Jane Bruton RN, BA, MA Medical Anthropology; Tanvi Rai PhD Public Health, MPH, BA, BSc: Sophie  
13 Day, PhD, BA, MA Anthropology; BSc Helen Ward PhD, FRCP, FFPH, MBChB, MSc Epidemiology.  
14  
15

16 Corresponding author:  
17 Pamela Jane Bruton,  
18 Department of Infectious Disease Epidemiology,  
19 School of Public Health,  
20 Imperial College,  
21 St Marys Campus,  
22 Norfolk Place,  
23 London.  
24 W2 1PG  
25 [jbruton@ic.ac.uk](mailto:jbruton@ic.ac.uk)  
26 0207 5943464  
27  
28

29 Co-authors:  
30 Rai, Tanvi: Imperial College London, Department of Infectious Disease Epidemiology.  
31 Day, Sophie; Imperial College London, Department of Infectious Disease Epidemiology and  
32 Goldsmiths College  
33 Ward, Helen; Imperial College London, Department of Infectious Disease Epidemiology.  
34  
35  
36  
37

38 Word count: Main text 3410  
39  
40  
41  
42  
43  
44  
45  
46  
47  
48  
49  
50  
51  
52  
53  
54  
55  
56  
57

## Abstract

Objectives: The care continuum provides a step-wise measure of success in managing HIV. Whilst useful for providers it does not inform us of the actual experience of individuals negotiating the different stages of the HIV care pathway. With the transformation from an acute life-threatening to a chronic long-term condition we hypothesised that the experience of being diagnosed, becoming a patient and starting treatment would have changed over the decades of the epidemic.

Methods: Qualitative interview study of 52 individuals attending two large HIV London clinics, purposively sampled, on the basis of being diagnosed at different stages in the history of the epidemic, into HIV “generations” and analysed thematically.

Results: Some important differences were identified; for earlier generations, the visible illness and deaths from AIDS made it harder to engage with care following diagnosis, likewise subsequent decisions about starting treatment were deeply influenced by the fear of severe side-effects associated with early antiretroviral therapy (ARV). However, despite improvements in ARV and life expectancy over the epidemic we found a striking similarity across the participants’ accounts of the key stages of the care continuum, regardless of when they were diagnosed. Diagnosis was a major traumatic life event for almost everyone, fear of testing positive or having low self-perceived risk affected the timing of testing and diagnosis, engaging with care was facilitated by a responsive and flexible approach from services/clinicians and initiating treatment was a major life decision.

Conclusion: A personal and holistic approach has been the hallmark of HIV care since the beginning of the epidemic. It is important that the major advances in biomedical treatment do not lead to an undermining of the care continuum through a loss of care that meets the needs of patients for whom HIV diagnosis and treatment remain significant challenges requiring supportive and flexible care.

### Strengths

- The large number of participants, at two different clinics and the inclusion of people with diverse characteristics and 4 HIV 'generations'.
- The interview format allowed us to explore factors important to participants rather than asking about pre-defined concerns.

### Limitations

- An imbalance between generations, with larger numbers of women in the earliest two generations and only one woman in the recently diagnosed. This means that some of our conclusions about generations may also reflect gendered differences.
- Our recruitment methods meant we were not able to explore the experiences of those who remain outside care.
- Limitation of the single interview format means people were having to recall past experiences, some of which were three decades ago. This may have introduced recall bias with subsequent experience colouring earlier reports.

## INTRODUCTION

The HIV continuum of care provides stepwise estimates for the stages of engagement in care for people living with HIV (PLHIV).[1] The UNAIDS goal to end the AIDS epidemic by 2020 stipulates a target of 90% of all people with HIV diagnosed, of whom 90% are on antiretroviral therapy (ARV), of whom 90% (73% of PLHIV) are virally suppressed.[2] The UK has one of the best outcomes for HIV treatment and care in the world with an estimated 78% of PLHIV having an undetectable viral load.[3, 4] However the statistics do not and cannot tell us about the patient experience of passing through these stages of care whether it be good or bad. The continuum essentially measures the success of programmes from a provider rather than a patient perspective.[5]

Flowers argues that there is a tension between the certainty and confidence of a linear HIV pathway, associated with ideas of clinical efficacy, and patient experiences of diagnosis and prognosis, which can be full of uncertainty.[4] With the evolution of modern ARVs we have witnessed the transformation of HIV from an acute life-threatening to a treatable chronic condition and a concurrent evolving of the care continuum. Analysis of the patients' experiences of passing through each of the stages of care may help to illuminate key factors in the care continuum. This reflection is important in a climate of NHS restructuring in the UK, which has led to reductions in non-clinical services and streamlining of care. To this end we explored the patient perspectives on the care continuum, and hypothesized that patients' experiences of, and engagement with, care would differ according to what point in the epidemic they were diagnosed.

## METHODS

We undertook a qualitative study of people attending two large London HIV clinics. We used a purposive sampling method to recruit patients with a range of experiences. To reflect the evolution of antiretroviral therapy (ARV), we identified four 'generations' according to time of diagnosis: pre-1996 (pre-ARV), 1997 to 2005 (complex ARVs), 2006 to 2012 (simpler ARVs), 2013 onwards (recent diagnoses). Within each generation, we aimed to include people with a range of characteristics, including, gender, exposure, age and ethnicity. Participants were recruited opportunistically by researchers attending clinical services, and through fliers and digital advertising in clinical areas. Recruitment was periodically checked against the recruitment matrix and under-represented groups/strata targeted.

Patients were provided with information and gave written consent. Interviews took place in private rooms in or near the clinics or at the patient's home; they were recorded and transcribed, and lasted between 60 and 90 minutes. The interviews were semi-structured and carried out by four researchers (JB, TR, CH, JR) with a topic guide (appended) informed by a focus group of PLHIV who

assisted in designing the research. We invited participants to recall their initial diagnosis and describe key points in their HIV journey including testing, disclosure, support, engaging with care, starting treatment, medication adherence, work and social life. Field notes were written after the interviews and focus group.

Transcripts were uploaded to NVIVO and analysed using an iterative process of reading and discussing the transcripts, identifying themes and coding the dataset. Final themes were discussed in the research group (HW, JB, SD, TR) and further analysed in relation to the existing literature.

Ethical approval was obtained from NRES (reference number 14/WM/0147) in May 2014, and research governance approval obtained from the local sites.

## RESULTS

Fifty-two patients were recruited, 25 at one clinic and 27 at the other. The sample included 41 men and 11 women; 37 men acquired HIV through sex with other men (MSM), the rest through heterosexual contact (14) or injection drug use (1). There were 11 in generation 1, 14 generation 2, 17 generation 3 and 10 generation 4. The characteristics of the study participants alongside those of the clinic population for 2014 are shown in Table 1.

**Table 1. Study sample characteristics compared with the cohorts**

|                       | Clinic A     |       |             |       | Clinic B     |       |             |       |
|-----------------------|--------------|-------|-------------|-------|--------------|-------|-------------|-------|
|                       | Study sample |       | 2014 Cohort |       | Study sample |       | 2014 Cohort |       |
| <b>Gender</b>         |              |       |             |       |              |       |             |       |
| Male                  | 18           | 72.0% | 2459        | 77.5% | 23           | 85.2% | 7743        | 90.3% |
| Female                | 7            | 28.0% | 715         | 22.5% | 4            | 14.8% | 830         | 9.7%  |
| <b>Age</b>            |              |       |             |       |              |       |             |       |
| 18-24                 | 0            | 0.0%  | 124         | 3.9%  | 0            | 0.0%  | 186         | 2.2%  |
| 25-34                 | 4            | 16.0% | 465         | 14.7% | 3            | 11.1% | 1729        | 20.2% |
| 35-49                 | 16           | 64.0% | 1502        | 47.3% | 14           | 51.9% | 4164        | 48.6% |
| 50+                   | 5            | 20.0% | 1083        | 34.1% | 10           | 37.0% | 2494        | 29.1% |
| <b>Ethnicity</b>      |              |       |             |       |              |       |             |       |
| White                 | 14           | 56.0% | 1541        | 48.6% | 22           | 81.5% | 6401        | 74.7% |
| Black African         | 5            | 20.0% | 720         | 22.7% | 5            | 18.5% | 778         | 9.1%  |
| Black Caribbean       | 0            | 0.0%  | 114         | 3.6%  | 0            | 0.0%  | 201         | 2.3%  |
| Other/Mixed           | 6            | 24.0% | 746         | 23.5% | 0            | 0.0%  | 1132        | 13.2% |
| Not reported          | 0            | 0.0%  | 53          | 1.7%  | 0            | 0.0%  | 61          | 0.7%  |
| <b>Exposure route</b> |              |       |             |       |              |       |             |       |
| Sex between men       | 15           | 60.0% | 1971        | 62.1% | 22           | 81.5% | 6776        | 79.0% |
| Heterosexual contact  | 9            | 36.0% | 1037        | 32.7% | 5            | 18.5% | 1209        | 14.1% |

|                          |   |       |      |       |    |       |      |       |
|--------------------------|---|-------|------|-------|----|-------|------|-------|
| Injecting drug use       | 1 | 4.0%  | 52   | 1.6%  | 0  | 0.0%  | 109  | 1.3%  |
| Other                    | 0 | 0.0%  | 112  | 3.5%  | 0  | 0.0%  | 46   | 0.5%  |
| Undetermined             | 0 | 0.0%  | 2    | 0.1%  | 0  | 0.0%  | 433  | 5.1%  |
| <b>Year of diagnosis</b> |   |       |      |       |    |       |      |       |
| Pre-1997                 | 6 | 24.0% | 638  | 20.1% | 5  | 18.5% | 1399 | 16.3% |
| 1997-2005                | 6 | 24.0% | 1234 | 38.9% | 8  | 29.6% | 2580 | 30.1% |
| 2006-2012                | 7 | 28.0% | 986  | 31.1% | 10 | 37.0% | 3199 | 37.3% |
| 2013 onwards             | 6 | 24.0% | 316  | 10.0% | 4  | 14.8% | 1395 | 16.3% |
| Total                    |   |       | 3174 |       |    |       | 8573 |       |

The generation samples differed somewhat by gender and acquisition: the women were concentrated in generations 1 and 2 (6 and 4 respectively), and MSM in generations 3 and 4 (16 and 8).

#### **“Becoming positive” – the impact of HIV diagnosis**

The experience of receiving an HIV diagnosis was similar across the generations. First reactions were generally of shock and fear of death, irrespective of generation. Alan (pseudonym), diagnosed in 1991, knew nothing about HIV and had not tested before. He remembers vividly the time he received his result:

*“I could hear myself saying ‘I’m going to die’. Not verbally but in my mind, ‘I’m going to die, I’m going to die’” (A6, Gen1, MSM)*

Roger, diagnosed more than 20 years later, reported several previous tests and considered himself well-informed. However, his principal concern on receiving a positive diagnosis was also about life expectancy:

*“But even I was not certain. Certainty is the wrong word. I was under the illusion that my expiry date was stamped on me now” (A25, Gen4, MSM)*

Fear of a positive result was a factor in delayed diagnosis for several MSM in all generations, who reported concerns about the impact of HIV on their lives. They were aware of their risk, and described feeling relieved at diagnosis as HIV had been *“hanging over them”* for years; the diagnosis confirmed their suspicions. William, who had never tested before, presented with symptoms:

*“[I had been] burying my head in the sand. I guess I knew I had it but didn’t, at the same time, want it confirmed” (B16, Gen2, MSM)*



1  
2  
3 Brian (B2, Gen4, MSM), recently diagnosed, had *“spent on and off probably 8 years thinking about it”*  
4 He felt he had *“done all the thinking before”* ... so although disappointed, he was also relieved.

5  
6 The response and level of support offered by clinicians at this critical time were important to  
7 participants' immediate wellbeing and influenced what happened next, including continuing  
8 engagement in care:  
9

10  
11 *“I remember how lovely [name of clinician] was and I've always said I could never wish for a*  
12 *better person to ever tell me or try to guide me, or to reassure me more than what she did*  
13 *because she was perfect”* (A24, Gen4, female)  
14  
15

16  
17 While most experiences were positive, there were some exceptions. Paul (B9, gen3, MSM) had  
18 regularly tested negative but continued to take risks. Testing positive in 2010 was totally  
19 unexpected, leaving him *“numb with shock”*, and he did not feel that he was supported  
20 appropriately. The clinician who gave him the diagnosis seemed *“[to be on] autopilot because he*  
21 *had seen people like me before”* and was *“working to his own agenda”*. Despite Paul's obvious  
22 distress, the clinician asked him to ring potential contacts during the consultation. Further, when the  
23 clinician said: *“Oh this can be managed, don't worry”*, Paul interpreted this to mean 'managed to his  
24 death'. After two weeks of acute anxiety, Paul contacted a friend who was able to reassure him  
25 about treatment and the care pathway. Similar experiences led other participants to feel vulnerable,  
26 isolated and slow to accept their diagnosis.  
27  
28  
29  
30  
31  
32

### 33 **“Becoming an HIV patient”: Developing a relationship with clinic and clinician**

34  
35 Once diagnosed, participants described a sense of reassurance about being in the *“best hands”*,  
36 managed by experts in HIV medicine. The majority across the generations described strong  
37 relationships with their clinicians and valued seeing the same person each visit. It felt *“like a*  
38 *partnership”* with *“someone you can tell anything”*, who knew them and their entire history,  
39 ensuring that care went beyond just the clinical management of HIV: *“We seriously talk about how I*  
40 *am not just what my CD4 count is”*.  
41  
42  
43  
44

45 However, some had not developed a trusting relationship. Marty (B13, gen3, MSM), for example,  
46 diagnosed HIV in 2012, was not eligible for treatment under guidelines at that point. He described  
47 anxiety about this lack of treatment, feeling that it adversely affected pre-existing mental health  
48 problems which were not addressed by his clinicians. He attended two different clinics and was on  
49 the verge of dropping out of care when, as he recounted: *“I basically rescued myself”*. His friend  
50 recommended a clinician: *“She got me just like that thank god, thank god...I finally found and she*  
51 *was willing to fight my case”*.  
52  
53  
54  
55  
56  
57

1  
2  
3 Another participant, Peter, diagnosed 2009, reported changing HIV clinics within three months of  
4 diagnosis. He recalled a series of mistakes, miscommunication and a “dehumanising” clinic  
5 environment. Losing trust in clinicians and the service, he finally gained confidence from attending a  
6 support group and moved his care  
7  
8

9  
10 *“I remember that I said, it was like falling off a building... I’m slowly falling backwards as the*  
11 *virus increases. It felt like they were holding a blanket at the bottom to catch me but it felt*  
12 *like they were holding it in the wrong place. I was being asked to trust”* (B24, Gen3, MSM)  
13

14 All participants valued continuity of care although two recently diagnosed felt that it was not always  
15 necessary to see the same clinician. But, continuity was affected by what some described as the very  
16 busy clinics limiting the time for consultations and impeding communication.  
17  
18

19 All participants were in care at the time of the interview but some described having stayed away in  
20 the past. Two of six women diagnosed before 1996 had dropped out of care for several years. Given  
21 the lack of effective treatment, they had found clinic visits depressing and preferred to keep away  
22 until they became sick. Marie (A8, gen1, female) explained, *“I didn’t want a life where I just would go*  
23 *to tests and I am scared and they had nothing to offer”*. Alison (B6, gen1, female) described the  
24 *“terrible situation”* at the clinic, where she saw young gay men, couples, where one would be fit and  
25 the other *“in a wheelchair, a skeleton”*. She felt sorry for the doctors - *“there were all these poor*  
26 *young doctors with nothing to offer and seeing these very ill people.”*  
27  
28  
29  
30  
31  
32

33 Seven of all those diagnosed since ARVs became available described occasional or multiple lapses in  
34 attendance; these were generally explained by issues external to the clinic such as recreational drug  
35 use, household disruption, mental health problems or competing co-morbidities. Re-engagement  
36 with care was easier when their clinician actively reached out; for example, some consultants had  
37 telephoned patients when they missed appointments and one woman (gen1) described  
38 interventions of this kind as being *“like my family”*. Even though not all patients were contacted  
39 when they did not attend services, and one expressed surprise that no-one had tried, all found their  
40 way back into care.  
41  
42  
43  
44  
45

#### 46 **“Becoming medicalised”: Starting treatment**

  
47

48 Almost all (48) of the participants were on treatment; one had stopped medication because of drug  
49 interactions and three chose to remain off treatment. Despite the simplification of regimens,  
50 participants in all four generations found the decision to start treatment a significant life event.  
51  
52

53 For earlier generations, the decision had been complex because of toxicity related to ARVs. Some  
54 refused treatment contrary to medical advice. Alison, described earlier, recalled, *“In the waiting*  
55  
56  
57

rooms people said, 'don't take it, it will kill you', so I refused that (AZT)". Others felt well without treatment like Marie who was diagnosed in 1986 but only started ARVs 25 years after diagnosis when her CD4 count crashed. She felt she had no choice, "I fought it all this time on my own, and then finally I had to give in and take a pill. That was kind of depressing".

Those diagnosed more recently found it easier to decide to begin treatment, but it was still a significant moment. Tim, diagnosed in 2012, was aware of the latest research and asked to start treatment immediately, even for him, the 'treatment appointment' was a sobering experience:

*"[It was] the only time there was a tear. I just thought, God this is a new chapter now. This is a new chapter in my life. I am going to have to take this pill for the rest of my life". (B7, Gen 3 MSM)*

Brian, diagnosed in 2013, sums up some of the issues that participants said they had considered when deciding to start medication:

*"Well the impact it would have on my life, the damage it would do to my body. Would I cope with the medication? Would I be able to continue working? Because so many people have side effects initially and it takes them a long time to get over. I had a lot of responsibility at work and I couldn't actually manage responsibility well enough once on medication. Would I be able to take the medication on time? Would life's pressures allow me to do what I needed to do? And so on" (B19, Gen 4, MSM)*

The three participants not on treatment described feeling healthy and wished to remain drug free for as long as possible.

For many participants, HIV occupied only a small part of their lives but daily medications proved to be a constant reminder of their status even if only for a moment each day.

Martin, diagnosed in 2014, described his relationship with his medication:

*"It's strange sometimes because you look at this pill and you think between you and this little pill lies – it's keeping you alive. And I have never had a pill to take like that before. So, it's very strange. It's my friend and foe at the same time" (A22, gen 4, MSM)*

## DISCUSSION

The revolution in HIV treatment over three decades means it can now be described as a chronic, manageable condition.[6, 7] In our study, all our patients were virally suppressed having passed through all the stages of the continuum and arrived on the other side. However, patients' recall of

1  
2  
3 their experience of navigating this journey revealed a range of quite complex issues faced by them at  
4 different points, reminding us that many challenges remain in the successful provision of HIV care.  
5  
6 We hypothesized that the revolution in treatment would have an impact on the experience of the  
7 different diagnostic generations moving through the care continuum, with those diagnosed more  
8 recently having a smoother journey. We identified some important differences; the visible illness  
9 and deaths from AIDS made it harder for earlier generations to engage with or remain in care and  
10 some dropped out, returning only when ill. Decisions about treatment were particularly difficult for  
11 the early generations, for whom the association of treatment with severe side effects remained  
12 strong until more recently and who expressed pride in, and determination to, remaining well  
13 without treatment.  
14  
15

16  
17  
18 However, our primary finding was of a striking similarity across participants' accounts of key stages  
19 of the HIV care continuum: diagnosis was a major, traumatic life event for almost everyone;  
20 anticipation of an HIV-positive status affected the timing of testing and diagnosis; engaging with care  
21 was facilitated by a responsive, flexible approach on the part of services and clinicians, starting with  
22 how the positive diagnosis was handled; and initiating treatment was a major life decision even  
23 when recommended by protocol and considered straightforward by clinicians.  
24  
25  
26  
27  
28  
29  
30  
31

32 Despite the drive to normalise HIV testing through simplified sampling, reduced pre-test discussion  
33 and expanded test settings,[8, 9] [10] receiving an HIV diagnosis remained a significant shock for  
34 most participants irrespective of generation, as suggested elsewhere.[11-14] Resonating with other  
35 studies.[12, 15, 16] , we found that fear of imminent death and experience of profound distress did  
36 not change despite the availability of effective and less toxic treatments. This fear, often coupled  
37 with a fear of social exclusion and rejection, led participants who suspected they were positive to  
38 delay testing.[17]  
39  
40  
41  
42

43 A clinician's approach to a patient with a positive result is considered critical to patients' experiences  
44 and may be more important than other aspects of the testing process.[11, 14, 18][16, 19] We found  
45 negative experiences at this critical point affected immediate well-being and further contact with  
46 services. The impact of those initial encounters, both good and bad, left participants with lasting  
47 impressions throughout their journey, thus demonstrating the importance of establishing trust  
48 between clinician and patient as a firm foundation for good retention in care.[20-22] . Moreover,  
49 the importance of that relationship for participants was underlined by their willingness to change  
50 their treatment centre until they found what they perceived as a good clinician/patient relationship.  
51  
52  
53  
54  
55  
56  
57

1  
2  
3 The UK policy of open access to any clinic through self-referral may be another explanation for high  
4 levels of retention in care.  
5

6 The prospect of treatment for life, to sustain life, was a major life event. Currently the moves  
7 towards starting treatment at diagnosis, the test-and-treat model, is based on the confidence of  
8 biomedicine in HIV management, but may be at odds with patient concerns.[23] BHIVA interim  
9 guidelines 2016 recommend starting treatment on all diagnosed with HIV regardless of CD4 count  
10 and continue to recognise that social, psychological, cultural, and economic factors can adversely  
11 affect adherence and treatment outcomes.[24] Starting medication on the same day as, or soon  
12 after, diagnosis when individuals may be distressed by the positive result could preclude a  
13 meaningful discussion of the patient's 'readiness to start'. Persson's 2016 study of patients not on  
14 ARVs found similar barriers and concerns: for example, logistics of starting life-long medication, fear  
15 of long term side effects and desire to stay drug-free whilst healthy.[25]  
16  
17  
18  
19  
20  
21

22 The evolution of simpler treatments has been accompanied by a reconfiguration of the care  
23 pathway. In London, HIV clinics are increasingly narrowly focused on HIV and HIV-specific  
24 medications and clinicians are not authorised to provide more holistic medical care.[26] In practice,  
25 this has led to less frequent clinic visits, a shift to virtual "e-clinics", and greater links with, and  
26 reliance on, general practitioners. The impact of this on the care continuum is unclear. Continuity of  
27 clinician, the atmosphere in the clinic and good communication are recognised to be key issues for  
28 patients.[27, 28], were reflected in our findings. It is therefore important that these are not lost with  
29 streamlining pathways. All our participants were virally suppressed but that can hide the reality of  
30 their reliance on the caregivers to help maintain that stability.  
31  
32  
33  
34  
35  
36  
37  
38  
39

40 The study's strengths are in the large number of participants, at two different clinics and the  
41 inclusion of diverse groups and the four generations. The semi-structured interview format allowed  
42 us to explore factors important to participants rather than asking about pre-defined concerns.  
43 However, our study sample was imbalanced between generations, with larger numbers of women in  
44 the earliest two generation and only one of those more recently diagnosed. This means that some of  
45 our conclusions about generation may also reflect gendered differences. Our recruitment methods  
46 that relied on recruitment from the two clinics meant we were not able to explore the experiences  
47 of those who remain outside care. The study is also limited by the single interview format which  
48 meant people were having to recall past experiences, some of which were three decades ago. This  
49 may have introduced recall bias with subsequent experience colouring earlier reports; moreover,  
50 earlier generations had more time to have disengaged and re-engaged with care.  
51  
52  
53  
54  
55  
56  
57

1  
2  
3 A personal, holistic approach has been a hallmark of HIV care since the beginning of the epidemic. It  
4 is important that major advances in biomedical treatment do not undermine the care continuum  
5 through a loss of care that meets the complex needs of patients, for whom HIV diagnosis and  
6 treatment remain significant challenges requiring supportive and flexible care.  
7  
8  
9

10  
11  
12  
13  
14 **Acknowledgements:** Thanks to participants for sharing their time and stories, to Jane Rowlands and  
15 Chris Higgs for conducting some of the interviews and the staff of both clinics for facilitating the  
16 study.  
17

18  
19 **Contributorship statement:** All four authors, J. Bruton, T. Rai, S. Day and H. Ward, were involved in  
20 the design of the study. J. Bruton and T. Rai completed the initial analysis and interpretation of the  
21 data and subsequent discussion and analysis was undertaken by all 4 authors through team  
22 discussion. J. Bruton completed the first draft of the manuscript. All four authors participated in  
23 critiquing and revising the draft manuscript and all approved the final draft.  
24

25 All four authors accept accountability for the submitted paper.  
26

27 T. Rai and J. Bruton only undertook the interviews alongside collaborators J. Rowlands and C.Higgs.  
28

29  
30 **Funders:** Funded by grants from Imperial NIHR Biomedical Research Centre, P35771, the Imperial  
31 College Healthcare Charity, P44223, and supported by the St Stephens AIDS Trust. No  
32 pharmaceutical grants were received in the development of this study.  
33

34 **Competing Interests:** There are no competing interests  
35

36  
37 **Data sharing statement:** The interview transcripts are anonymised and stored securely at Imperial  
38 College London on a password protected database on a password protected computer. The  
39 participants were assured of the security of their data and they would remain confidential.  
40  
41  
42  
43  
44  
45  
46  
47  
48  
49  
50  
51  
52  
53  
54  
55  
56  
57

## References

1. Gardner, E.M., et al., *The Spectrum of Engagement in HIV Care and its Relevance to Test-and-Treat Strategies for Prevention of HIV Infection*. Clinical Infectious Diseases, 2011. **52**(6): p. 793-800.
2. UNAIDS, *UNAIDS. 90-90-90 - an ambitious treatment target to help end the AIDS epidemic (accessed June 21, 2017) <http://www.unaids.org/en/resources/documents/2014/90-90-90>*. 2014.
3. Kirwan PD, C.C., Brown AE., Gill ON., Delpech VC. and contributors, *HIV in the UK: 2016 Report*. 2016, Public Health England: London.
4. Flowers, P., et al., *Understanding the impact of HIV diagnosis amongst gay men in Scotland: an interpretative phenomenological analysis*. Psychol Health, 2011. **26**(10): p. 1378-91.
5. Christopoulos, K.A., et al., *"Taking a half day at a time:" patient perspectives and the HIV engagement in care continuum*. AIDS Patient Care STDS, 2013. **27**(4): p. 223-30.
6. Deeks, S.G., S.R. Lewin, and D.V. Havlir, *The End of AIDS: HIV Infection as a Chronic Disease*. Lancet, 2013. **382**(9903): p. 1525-1533.
7. Yehia, B.R., et al., *Structures of Care in the Clinics of the HIV Research Network*. AIDS Patient Care and STDs, 2008. **22**(12): p. 1007-1013.
8. Ogaz D., F.M., Connor N., Gill ON. and contributors, *HIV testing in England:2016 report*. 2016, Public Health England: London England.
9. Rayment, M., et al., *HIV Testing in Non-Traditional Settings – The HINTS Study: A Multi-Centre Observational Study of Feasibility and Acceptability*. PLOS ONE, 2012. **7**(6): p. e39530.
10. Wise, J., *Guidelines call for HIV testing to be "normalised"*. BMJ, 2008. **337**.
11. Roth, N.L. and M.S. Nelson, *HIV diagnosis rituals and identity narratives*. AIDS Care, 1997. **9**(2): p. 161-180.
12. Stevens, P.E. and E. Hildebrandt, *Life changing words: women's responses to being diagnosed with HIV infection*. ANS Adv Nurs Sci, 2006. **29**(3): p. 207-21.
13. Stevens, P.E. and B. Tighe Doerr, *Trauma of discovery: women's narratives of being informed they are HIV-infected*. AIDS Care, 1997. **9**(5): p. 523-38.
14. Anderson, M., et al., *"It took a piece of me": initial responses to a positive HIV diagnosis by Caribbean people in the UK*. AIDS Care, 2010. **22**(12): p. 1493-8.
15. Meursing, K. and F. Sibindi, *HIV counselling – a luxury or necessity?* Health Policy and Planning, 2000. **15**(1): p. 17-23.
16. Christopoulos, K.A., et al., *Patient Perspectives on the Experience of Being Newly Diagnosed with HIV in the Emergency Department/Urgent Care Clinic of a Public Hospital*. PLOS ONE, 2013. **8**(8): p. e74199.
17. Clifton, S., et al., *HIV testing, risk perception, and behaviour in the British population*. Aids, 2016. **30**(6): p. 943-52.
18. Worthington, C. and T. Myers, *Desired elements of HIV testing services: test recipient perspectives*. AIDS Patient Care STDS, 2002. **16**(11): p. 537-48.
19. Hult, J.R., S.A. Maurer, and J.T. Moskowitz, *"I'm sorry, you're positive": a qualitative study of individual experiences of testing positive for HIV*. AIDS Care, 2009. **21**(2): p. 185-8.
20. Kempf, M.C., et al., *A qualitative study of the barriers and facilitators to retention-in-care among HIV-positive women in the rural southeastern United States: implications for targeted interventions*. AIDS Patient Care STDS, 2010. **24**(8): p. 515-20.
21. Yehia, B.R., et al., *Barriers and facilitators to patient retention in HIV care*. BMC Infectious Diseases, 2015. **15**(1): p. 246.



- 1  
2  
3 22. Engelhard, E.A., et al., *Impact of HIV care facility characteristics on the cascade of care in*  
4 *HIV-infected patients in the Netherlands*. AIDS, 2016. **30**(2): p. 301-310.  
5 23. Newman, C.E., *Appreciating doubts about HIV medicine*. 2015. Vol. 18. 2015.  
6 24. BHIVA, *British HIV Association guidelines for the treatment of HIV-1- positive adults with*  
7 *antiretroviral therapy. 2015 (2016 interim update)*  
8  
9 2016.  
10 25. Persson, A., et al., *On the Margins of Pharmaceutical Citizenship: Not Taking HIV Medication*  
11 *in the "Treatment Revolution" Era*. Med Anthropol Q, 2016. **30**(3): p. 359-77.  
12 26. Miller R., G.J., *Commissioning London's HIV Services*. 2011, Civitas (Institute for the Study of  
13 Civil Society).  
14 27. Weatherburn P., K.P., Reid D., Hammond G., Jessup K., *My care I care: A study of what*  
15 *people with HIV value about NHS HIV Services across London*. 2013, Sigma Research.  
16 28. Haggerty, J.L., et al., *Continuity of care: a multidisciplinary review*. BMJ: British Medical  
17 Journal, 2003. **327**(7425): p. 1219.  
18  
19  
20  
21  
22  
23  
24  
25  
26  
27  
28  
29  
30  
31  
32  
33  
34  
35  
36  
37  
38  
39  
40  
41  
42  
43  
44  
45  
46  
47  
48  
49  
50  
51  
52  
53  
54  
55  
56  
57  
58  
59  
60



## Key statements

- A qualitative study understanding the patients' perspective of their experience of the HIV care continuum
- The diverse study cohort spans 4 'generations' diagnosed at different time points between 1986 and 2014 reflecting the evolution of ARV's
- There are striking similarities of experience and significance at key points on the continuum: diagnosis, engaging in care and starting treatment
- Despite advances of biomedical treatment clinical services should continue to recognise the needs of patients for whom HIV diagnosis and treatment remains a significant challenge

peer review only

## HIV patient interview topic guide

### **Overview description (recap and summary of information in the patient information sheet)**

During this project we wish to find out people's own experiences of their life with HIV starting from the beginning, before you were diagnosed and going all the way up to the present. There are some specific areas we wish to cover, however you are free to discuss what you feel are important issues or areas that have been relevant in your HIV journey.

### **Questions:**

*[May or may not need to ask all the questions specifically, this is just a guide, some questions overlap]*

#### **1. Personal information – work/relationships/home situation**

Can you tell me a bit about yourself....

- a. What are your home circumstances?
- b. Are you in a relationship/s?
- c. Do you have dependents children? Parents? partner ?
- d. Do you work? What do you do? Benefits?

#### **2. Testing decisions**

- a. Can you tell me when you were diagnosed?
- b. How did you come to be tested?
- c. Where did you go for your test? Why?
- d. Had you had HIV tests before, if so why?
- e. What was your health like before your diagnosis?
- f. Had/did you know anybody living with HIV at the time?

#### **3. Experience of initial care**

- a. What happened when you were given your positive result?
- b. Can you remember what information you were given at the time? Was this given in the way you wanted? Please can you tell me in detail.
- c. What questions, if any, did you have for the clinical staff? Did you ask them?

- d. Did you tell anyone / talk to anyone after you found out your results? Can you tell me a bit more about this – who were they, was it helpful to talk to them, etc.?
- e. Did you access information about HIV? How? where? How has this helped?
- f. What did you do after receiving your diagnosis?
- g. Which HIV clinic did you go to? Why? Are you still at that clinic? Why?

#### 4. Treatment decisions and research

- a. Are you on treatment ?
- b. How was the decision to start taken? Were you involved in that decision?
- c. What preparation did you make?
- d. (If not on treatment) What are your thoughts about going on treatment?  
  
(If on treatment) What do you think / have you any thoughts about being on treatment?
- e. (If on treatment) How do you find taking your medication?
- f. Have you discussed your thoughts about treatment with anyone?
- g. Do you know what recommendations there are for when people might start treatment?
- h. Are you aware of the research into ARVs and treatment guidelines in the UK?
- i. What do you know about them? What do you think of them?
- j. How have they influenced your understanding of treatment?
- k. Have they influenced your decision to start/change/stop treatment?
- l. Do you take part in clinical trials? Why?

#### 5. Clinical care

- a. How often do you go to the clinic? Has that changed over the time you have been in the clinic? How?
- b. Who do you see? And for what? Doctor? Consultant? Nurse? Peer support? Health Advisor? etc
- c. What kind of care have you received at the clinic? Any good/bad experiences?
- d. What do you think the role of the clinic is in your care?
- e. What other clinical services do you access? Where? How is your care coordinated?
- f. What do you think about the way in which HIV services are currently organised? Does it work for you?
- g. Have they changed? In what way?
- h. Are you aware of possible future changes in the services?

1  
2  
3 **6. Primary care /Community and Social care**  
4

- 5 a. Where do you go for your primary care needs? Why? What is your experience of primary  
6 care?  
7  
8 b. How is your care coordinated between primary care and the clinic?  
9  
10 c. Do you access any social care or voluntary services? If so what? Why?  
11  
12 d. Do they meet your needs? If not why?  
13  
14 e. Have you seen any changes in what is available? If so what?

15 **7. Living with HIV**  
16

- 17 a. Has having HIV affected your life? What are the most significant ways HIV has affected  
18 your life, and has that changed over time?  
19  
20 b. Do you know others living with HIV? What impact does that have on your life?  
21  
22 c. What kind of support have you had/needed since you were diagnosed positive? Has this  
23 changed over time?  
24

25 **8. Is there anything else you would like to say?**  
26

- 27 a. Given your experience of living with HIV, what would you say to others who have been  
28 recently diagnosed about what to expect?  
29  
30  
31  
32  
33  
34  
35  
36  
37  
38  
39  
40  
41  
42  
43  
44  
45  
46  
47  
48  
49  
50  
51  
52  
53  
54  
55  
56  
57  
58  
59  
60

## COREQ (COnsolidated criteria for REporting Qualitative research) Checklist

A checklist of items that should be included in reports of qualitative research. You must report the page number in your manuscript where you consider each of the items listed in this checklist. If you have not included this information, either revise your manuscript accordingly before submitting or note N/A.

| Topic                                          | Item No. | Guide Questions/Description                                                                                                                              | Reported on Page No. |
|------------------------------------------------|----------|----------------------------------------------------------------------------------------------------------------------------------------------------------|----------------------|
| <b>Domain 1: Research team and reflexivity</b> |          |                                                                                                                                                          |                      |
| <i>Personal characteristics</i>                |          |                                                                                                                                                          |                      |
| Interviewer/facilitator                        | 1        | Which author/s conducted the interview or focus group?                                                                                                   |                      |
| Credentials                                    | 2        | What were the researcher's credentials? E.g. PhD, MD                                                                                                     |                      |
| Occupation                                     | 3        | What was their occupation at the time of the study?                                                                                                      |                      |
| Gender                                         | 4        | Was the researcher male or female?                                                                                                                       |                      |
| Experience and training                        | 5        | What experience or training did the researcher have?                                                                                                     |                      |
| <i>Relationship with participants</i>          |          |                                                                                                                                                          |                      |
| Relationship established                       | 6        | Was a relationship established prior to study commencement?                                                                                              |                      |
| Participant knowledge of the interviewer       | 7        | What did the participants know about the researcher? e.g. personal goals, reasons for doing the research                                                 |                      |
| Interviewer characteristics                    | 8        | What characteristics were reported about the interviewer/facilitator? e.g. Bias, assumptions, reasons and interests in the research topic                |                      |
| <b>Domain 2: Study design</b>                  |          |                                                                                                                                                          |                      |
| <i>Theoretical framework</i>                   |          |                                                                                                                                                          |                      |
| Methodological orientation and Theory          | 9        | What methodological orientation was stated to underpin the study? e.g. grounded theory, discourse analysis, ethnography, phenomenology, content analysis |                      |
| <i>Participant selection</i>                   |          |                                                                                                                                                          |                      |
| Sampling                                       | 10       | How were participants selected? e.g. purposive, convenience, consecutive, snowball                                                                       |                      |
| Method of approach                             | 11       | How were participants approached? e.g. face-to-face, telephone, mail, email                                                                              |                      |
| Sample size                                    | 12       | How many participants were in the study?                                                                                                                 |                      |
| Non-participation                              | 13       | How many people refused to participate or dropped out? Reasons?                                                                                          |                      |
| <i>Setting</i>                                 |          |                                                                                                                                                          |                      |
| Setting of data collection                     | 14       | Where was the data collected? e.g. home, clinic, workplace                                                                                               |                      |
| Presence of non-participants                   | 15       | Was anyone else present besides the participants and researchers?                                                                                        |                      |
| Description of sample                          | 16       | What are the important characteristics of the sample? e.g. demographic data, date                                                                        |                      |
| <i>Data collection</i>                         |          |                                                                                                                                                          |                      |
| Interview guide                                | 17       | Were questions, prompts, guides provided by the authors? Was it pilot tested?                                                                            |                      |
| Repeat interviews                              | 18       | Were repeat interviews carried out? If yes, how many?                                                                                                    |                      |
| Audio/visual recording                         | 19       | Did the research use audio or visual recording to collect the data?                                                                                      |                      |
| Field notes                                    | 20       | Were field notes made during and/or after the interview or focus group?                                                                                  |                      |
| Duration                                       | 21       | What was the duration of the interviews or focus group?                                                                                                  |                      |
| Data saturation                                | 22       | Was data saturation discussed?                                                                                                                           |                      |
| Transcripts returned                           | 23       | Were transcripts returned to participants for comment and/or                                                                                             |                      |

| Topic                                  | Item No. | Guide Questions/Description                                                                                                        | Reported on Page No. |
|----------------------------------------|----------|------------------------------------------------------------------------------------------------------------------------------------|----------------------|
|                                        |          | correction?                                                                                                                        |                      |
| <b>Domain 3: analysis and findings</b> |          |                                                                                                                                    |                      |
| <i>Data analysis</i>                   |          |                                                                                                                                    |                      |
| Number of data coders                  | 24       | How many data coders coded the data?                                                                                               |                      |
| Description of the coding tree         | 25       | Did authors provide a description of the coding tree?                                                                              |                      |
| Derivation of themes                   | 26       | Were themes identified in advance or derived from the data?                                                                        |                      |
| Software                               | 27       | What software, if applicable, was used to manage the data?                                                                         |                      |
| Participant checking                   | 28       | Did participants provide feedback on the findings?                                                                                 |                      |
| <i>Reporting</i>                       |          |                                                                                                                                    |                      |
| Quotations presented                   | 29       | Were participant quotations presented to illustrate the themes/findings?<br>Was each quotation identified? e.g. participant number |                      |
| Data and findings consistent           | 30       | Was there consistency between the data presented and the findings?                                                                 |                      |
| Clarity of major themes                | 31       | Were major themes clearly presented in the findings?                                                                               |                      |
| Clarity of minor themes                | 32       | Is there a description of diverse cases or discussion of minor themes?                                                             |                      |

Developed from: Tong A, Sainsbury P, Craig J. Consolidated criteria for reporting qualitative research (COREQ): a 32-item checklist for interviews and focus groups. *International Journal for Quality in Health Care*. 2007. Volume 19, Number 6: pp. 349 – 357

**Once you have completed this checklist, please save a copy and upload it as part of your submission. DO NOT include this checklist as part of the main manuscript document. It must be uploaded as a separate file.**

# BMJ Open

## Patient perspectives on the HIV continuum of care in London: a qualitative study of people diagnosed between 1986 and 2014

|                                 |                                                                                                                                                                                                                                                                                                                                                                                                         |
|---------------------------------|---------------------------------------------------------------------------------------------------------------------------------------------------------------------------------------------------------------------------------------------------------------------------------------------------------------------------------------------------------------------------------------------------------|
| Journal:                        | <i>BMJ Open</i>                                                                                                                                                                                                                                                                                                                                                                                         |
| Manuscript ID                   | bmjopen-2017-020208.R1                                                                                                                                                                                                                                                                                                                                                                                  |
| Article Type:                   | Research                                                                                                                                                                                                                                                                                                                                                                                                |
| Date Submitted by the Author:   | 05-Jan-2018                                                                                                                                                                                                                                                                                                                                                                                             |
| Complete List of Authors:       | Bruton, Jane; Imperial College London, Department of Infectious Disease Epidemiology<br>Rai, Tanvi; Imperial College London, Department of Infectious Disease Epidemiology<br>Day, Sophie; Imperial College London, Department of Infectious Disease Epidemiology; Goldsmiths University of London, Anthropology<br>Ward, Helen; Imperial College London, Department of Infectious Disease Epidemiology |
| <b>Primary Subject Heading</b>: | HIV/AIDS                                                                                                                                                                                                                                                                                                                                                                                                |
| Secondary Subject Heading:      | Qualitative research, Health services research, Patient-centred medicine                                                                                                                                                                                                                                                                                                                                |
| Keywords:                       | HIV & AIDS < INFECTIOUS DISEASES, QUALITATIVE RESEARCH, PATIENT EXPERIENCE, HIV CARE CONTINUUM                                                                                                                                                                                                                                                                                                          |
|                                 |                                                                                                                                                                                                                                                                                                                                                                                                         |

SCHOLARONE™  
Manuscripts

only

1  
2  
3  
4  
5 **Patient perspectives on the HIV continuum of care in London: a**  
6 **qualitative study of people diagnosed between 1986 and 2014**  
7  
8  
9

10  
11 Jane Bruton RN, BA, MA Medical Anthropology; Tanvi Rai PhD Public Health, MPH, BA, BSc; Sophie  
12 Day, PhD, BA, MA Anthropology; BSc Helen Ward PhD, FRCP, FFPH, MBChB, MSc Epidemiology.  
13

14  
15 Corresponding author:  
16 Pamela Jane Bruton,  
17 Department of Infectious Disease Epidemiology,  
18 School of Public Health,  
19 Imperial College,  
20 St Mary's Campus,  
21 Norfolk Place,  
22 London.  
23 W2 1PG  
24 [jbruton@ic.ac.uk](mailto:jbruton@ic.ac.uk)  
25 0207 5943464  
26

27  
28 Co-authors:  
29 Rai, Tanvi: Imperial College London, Department of Infectious Disease Epidemiology.  
30 Day, Sophie: Imperial College London, Department of Infectious Disease Epidemiology and  
31 Goldsmiths College  
32 Ward, Helen: Imperial College London, Department of Infectious Disease Epidemiology.  
33  
34

35 Word count: Main text 3410  
36  
37  
38  
39  
40  
41  
42  
43  
44  
45  
46  
47  
48  
49  
50  
51  
52  
53  
54  
55  
56  
57



## Abstract

Background: The care continuum provides a step-wise measure of success in managing HIV. Whilst useful for providers it does not inform us of the actual experience of individuals negotiating the different stages of the HIV care pathway. Recognising the revolution in HIV treatments, the consequent transformation from an acute life-threatening to a chronic long-term condition, and changes in care delivery, we hypothesised that patients' experience may differ according the point at which they were diagnosed in the epidemic.

Methods: Qualitative interview study of 52 individuals attending two large London HIV clinics, purposively sampled, on the basis of being diagnosed at different stages in the history of the epidemic, into HIV "generations" and analysed thematically.

Results: Some important differences were identified; for earlier generations, the visible illness and deaths from AIDS made it harder to engage with care following diagnosis. Subsequent decisions about starting treatment were deeply influenced by the fear of severe side-effects from early antiretroviral therapy (ART). However, despite improvements in ART and life expectancy over the epidemic we found a striking similarity across participants' accounts of the key stages of the care continuum, regardless of when they were diagnosed. Diagnosis was a major traumatic life event for almost everyone, fear of testing positive or having low self-perceived risk affected the timing of testing and diagnosis, engaging with care was facilitated by a flexible approach from services/clinicians and initiating treatment was a major life decision.

Conclusion: We found patients' experiences are influenced by when they were diagnosed, with earliest cohorts facing substantial challenges. However, being diagnosed with HIV and starting treatment continue to be significant life-altering events even in the era of effective, simple treatments. Despite the advances of biomedical treatment services should continue to recognise the needs of patients for whom the diagnosis and treatment remain significant challenges.

### Strengths

- The large number of participants, at two different clinics and the inclusion of a range of people with HIV, broadly similar to the clinic cohorts, across four HIV 'generations'.
- The interview format allowed us to explore factors important to participants rather than asking about pre-defined concerns.

### Limitations

- An imbalance between generations, with larger numbers of women in the earliest two generations and only one woman in the generation recently diagnosed. This means that some of our conclusions about generations may also reflect gendered differences.
- Our recruitment methods meant we were not able to explore the experiences of those who remain outside care.
- Limitation of the single interview format means people were having to recall past experiences, some of which were three decades ago. This may have introduced recall bias with subsequent experience colouring earlier reports.

## INTRODUCTION

The Human Immunodeficiency Virus (HIV) continuum of care provides stepwise estimates for the stages of engagement in care for people living with HIV (PLHIV).(1) The Joint United Nations Programme on HIV and AIDS (UNAIDS) goal to end the Acquired Immune Deficiency Syndrome (AIDS) epidemic by 2020 stipulates a target of 90% of all people with HIV be diagnosed, of whom 90% are on antiretroviral therapy (ART), of whom 90% (73% of PLHIV) are virally suppressed.(2) The United Kingdom (UK) has one of the best outcomes for HIV treatment and care in the world with an estimated 78% of PLHIV having an undetectable viral load.(3, 4) However the statistics do not and cannot tell us about the patient experience of passing through these stages of care whether it be good or bad. The continuum essentially measures the success of programmes from a provider rather than a patient perspective.(5)

Flowers argues that there is a tension between the certainty and confidence of a linear HIV pathway, associated with ideas of clinical efficacy, and patient experiences of diagnosis and prognosis, which can be full of uncertainty.(4) With the evolution of modern ARTs we have witnessed the transformation of HIV from an acute life-threatening infection to a treatable chronic condition and a concurrent evolving of the care continuum. However, it is unclear whether this change is reflected in patients' own experiences of passing through each of the stages of care. For example, has the moment of diagnosis become any less traumatic, and have decisions about starting treatment become simpler for patients? Analysis of patient narratives, historically and currently, may help to highlight significant factors for patients in the care continuum. This is particularly important in a climate of National Health Service (NHS) restructuring in the UK, which has led to reductions in non-clinical services and streamlining of care. To this end we explored the patient perspectives on the care continuum. And we hypothesized that patients' experiences of, and engagement with, care would differ according to what point in the epidemic they were diagnosed.

## METHODS

We undertook a qualitative study of people attending two public HIV clinics in London that have provided care since the start of the epidemic; they were also chosen for their large size and diversity, in terms of demographics. They are both specialist HIV clinics linked to sexual health (genitourinary medicine) services. Care is provided by physician-led multidisciplinary teams where patients have a named consultant. HIV care in the UK is free and open access, allowing patients to register at their clinic of choice. We used a purposive sampling method to recruit patients with a range of experiences. To reflect the evolution of antiretroviral therapy (ART), we identified four 'generations' according to time of diagnosis: pre-1996 (pre-ART), 1997 to 2005 (complex ARTs), 2006 to 2012

(simpler ARTs), 2013 onwards (recent diagnoses). Within each generation, we aimed to include people with a range of characteristics, including, gender, exposure, age and ethnicity. Participants were recruited opportunistically by researchers attending clinical services, and through fliers and digital advertising in clinical areas. Recruitment was periodically checked against the recruitment matrix and under-represented groups/strata targeted.

Patients were provided with information and gave written consent. Interviews took place in private rooms in or near the clinics or at the patient's home; they were recorded and transcribed, and lasted between 60 and 90 minutes. The interviews were semi-structured and carried out by one male and three female researchers (JB, TR, CH, JR), three of whom had clinical backgrounds. The interviews were based on a topic guide (appended) informed by a focus group of PLHIV who assisted in designing the research. We invited participants to recall their initial diagnosis and describe key points in their HIV journey including testing, disclosure, support, engaging with care, starting treatment, medication adherence, work and social life. Field notes were written after the interviews.

Transcripts were uploaded to NVivo, a qualitative data analysis software package. Using Framework analysis, we developed key themes through a systematic process which involved reading, rereading, coding and summarising the transcripts; and subsequent in-depth analysis of the dataset.<sup>(6)</sup> Final themes were discussed in the research group (HW, JB, SD, TR) and further analysed in relation to the existing literature.

Ethical approval was obtained from the National Research Ethics Service (NRES) (reference number 14/WM/0147) in May 2014, and research governance approval obtained from the local sites.

## RESULTS

Fifty-two patients were recruited, 25 at one clinic and 27 at the other. The sample included 41 men and 11 women; 37 men acquired HIV through sex with other men (MSM), the rest through heterosexual contact (14) or injection drug use (1). There were 11 in generation 1, 14 generation 2, 17 generation 3 and 10 generation 4. The characteristics of the study participants alongside those of the clinic population for 2014 are shown in Table 1.

**Table 1. Study sample characteristics compared with the clinic cohorts**

|               | Clinic A     |       |             |       | Clinic B     |       |             |       |
|---------------|--------------|-------|-------------|-------|--------------|-------|-------------|-------|
|               | Study sample |       | 2014 Cohort |       | Study sample |       | 2014 Cohort |       |
| <b>Gender</b> |              |       |             |       |              |       |             |       |
| Male          | 18           | 72.0% | 2459        | 77.5% | 23           | 85.2% | 7743        | 90.3% |
| Female        | 7            | 28.0% | 715         | 22.5% | 4            | 14.8% | 830         | 9.7%  |

|                          |    |       |      |       |    |       |      |       |  |
|--------------------------|----|-------|------|-------|----|-------|------|-------|--|
| <b>Age</b>               |    |       |      |       |    |       |      |       |  |
| 18-24                    | 0  | 0.0%  | 124  | 3.9%  | 0  | 0.0%  | 186  | 2.2%  |  |
| 25-34                    | 4  | 16.0% | 465  | 14.7% | 3  | 11.1% | 1729 | 20.2% |  |
| 35-49                    | 16 | 64.0% | 1502 | 47.3% | 14 | 51.9% | 4164 | 48.6% |  |
| 50+                      | 5  | 20.0% | 1083 | 34.1% | 10 | 37.0% | 2494 | 29.1% |  |
| <b>Ethnicity</b>         |    |       |      |       |    |       |      |       |  |
| White                    | 14 | 56.0% | 1541 | 48.6% | 22 | 81.5% | 6401 | 74.7% |  |
| Black African            | 5  | 20.0% | 720  | 22.7% | 5  | 18.5% | 778  | 9.1%  |  |
| Black Caribbean          | 0  | 0.0%  | 114  | 3.6%  | 0  | 0.0%  | 201  | 2.3%  |  |
| Other/Mixed              | 6  | 24.0% | 746  | 23.5% | 0  | 0.0%  | 1132 | 13.2% |  |
| Not reported             | 0  | 0.0%  | 53   | 1.7%  | 0  | 0.0%  | 61   | 0.7%  |  |
| <b>Exposure route</b>    |    |       |      |       |    |       |      |       |  |
| Sex between men          | 15 | 60.0% | 1971 | 62.1% | 22 | 81.5% | 6776 | 79.0% |  |
| Heterosexual contact     | 9  | 36.0% | 1037 | 32.7% | 5  | 18.5% | 1209 | 14.1% |  |
| Injecting drug use       | 1  | 4.0%  | 52   | 1.6%  | 0  | 0.0%  | 109  | 1.3%  |  |
| Other                    | 0  | 0.0%  | 112  | 3.5%  | 0  | 0.0%  | 46   | 0.5%  |  |
| Undetermined             | 0  | 0.0%  | 2    | 0.1%  | 0  | 0.0%  | 433  | 5.1%  |  |
| <b>Year of diagnosis</b> |    |       |      |       |    |       |      |       |  |
| Pre-1997                 | 6  | 24.0% | 638  | 20.1% | 5  | 18.5% | 1399 | 16.3% |  |
| 1997-2005                | 6  | 24.0% | 1234 | 38.9% | 8  | 29.6% | 2580 | 30.1% |  |
| 2006-2012                | 7  | 28.0% | 986  | 31.1% | 10 | 37.0% | 3199 | 37.3% |  |
| 2013 onwards             | 6  | 24.0% | 316  | 10.0% | 4  | 14.8% | 1395 | 16.3% |  |
| Total                    |    |       | 3174 |       |    |       | 8573 |       |  |

The generation samples differed somewhat by gender and acquisition: the women were concentrated in generations 1 and 2 (six and four respectively), and MSM in generations 3 and 4 (16 and eight).

### **“Becoming positive” – the impact of HIV diagnosis**

The experience of receiving an HIV diagnosis was similar across the generations. First reactions were generally of shock and fear of death, irrespective of generation. Alan (pseudonym), diagnosed in 1991, knew nothing about HIV and had not tested before. He remembers vividly the time he received his result:

*“I could hear myself saying ‘I’m going to die’. Not verbally but in my mind, ‘I’m going to die, I’m going to die’” (gen1, MSM)*

1  
2  
3 Sylvia, diagnosed 2001, was “totally devastated”:

4  
5 *“... I didn’t see myself going back and doing my Master’s degree for what reason am I going*  
6 *back to do that if I have maybe five years to live”* (gen 2, woman)  
7

8 Roger, diagnosed more than 20 years later, reported several previous tests and considered himself  
9 well-informed. However, his principal concern on receiving a positive diagnosis was also about life  
10 expectancy:  
11

12  
13 *“But even I was not certain. Certainty is the wrong word. I was under the illusion that my*  
14 *expiry date was stamped on me now”* (gen4, MSM)  
15  
16

17 Fear of a positive result was a key factor in delayed diagnosis for several MSM in all generations,  
18 who reported concerns about the impact of HIV on their lives. They were aware of their risk, and  
19 described feeling relieved at diagnosis as HIV had been “*hanging over them*” for years; the diagnosis  
20 confirmed their suspicions. William, who had never tested before, presented with symptoms:  
21  
22

23  
24 *“[I had been] burying my head in the sand. I guess I knew I had it but didn’t, at the same*  
25 *time, want it confirmed”* (gen2, MSM)  
26  
27

28 Brian (Gen4, MSM), recently diagnosed, had “*spent on and off probably eight years thinking about*  
29 *it*” He felt he had “*done all the thinking before*” ... so although disappointed, he was also relieved.  
30

31 Most other participants, particularly heterosexual men and women, were not expecting a positive  
32 result and had not requested an HIV test. They were diagnosed either following ongoing symptoms  
33 of ill health or having presented for a general sexual health check-up.  
34  
35

36 None of the women were diagnosed through routine ante-natal screening. For example, Olivia,  
37 diagnosed in 1998, had not been tested in pregnancy. Her six-month old baby became sick, and both  
38 baby and husband were then diagnosed with HIV but she did not believe she had HIV and delayed  
39 testing for several weeks  
40

41  
42 *“Me I don’t have HIV because I never went with other men”* (gen2, woman)  
43

44 The response and level of support offered by clinicians at this critical time were important to  
45 participants’ immediate wellbeing and influenced what happened next, including continuing  
46 engagement in care. Martha remarked:  
47  
48

49 *“I remember how lovely [name of clinician] was and I’ve always said I could never wish for a*  
50 *better person to ever tell me or try to guide me, or to reassure me more than what she did*  
51 *because she was perfect”* (Gen4, woman)  
52  
53

54 While most experiences were positive, there were some exceptions. Paul (gen3, MSM) had regularly  
55 tested negative but continued to take risks. Testing positive in 2010 was totally unexpected, leaving  
56  
57

1  
2  
3 him “*numb with shock*”, and he did not feel that he was supported appropriately. The clinician who  
4 gave him the diagnosis seemed “[to be on] *autopilot because he had seen people like me before*” and  
5 was “*working to his own agenda*”. Despite Paul’s obvious distress, the clinician asked him to ring  
6 potential contacts during the consultation. Further, when the clinician said: “*Oh this can be*  
7 *managed, don’t worry*”, Paul interpreted this to mean ‘managed to his death’. After two weeks of  
8 acute anxiety, Paul contacted a friend who was able to reassure him about treatment and the care  
9 pathway. Similar experiences led other participants to feel vulnerable, isolated and slow to accept  
10 their diagnosis.  
11  
12  
13  
14  
15  
16  
17

### 18 **“Becoming an HIV patient”: Developing a relationship with clinic and clinician**

19  
20 Once diagnosed, participants described a sense of reassurance about being in the “best hands”,  
21 managed by experts in HIV medicine. The majority across the generations described strong  
22 relationships with their clinicians and valued seeing the same person each visit. It felt “*like a*  
23 *partnership*” with “*someone you can tell anything*”, who knew them and their entire history,  
24 ensuring that care went beyond just the clinical management of HIV: “*We seriously talk about how I*  
25 *am not just what my CD4 count is*”.  
26  
27  
28  
29

30 However, some had not developed a trusting relationship. Marty (gen3, MSM), for example,  
31 diagnosed HIV in 2012, was not eligible for treatment under guidelines at that point. He described  
32 anxiety about this lack of treatment, feeling that it adversely affected pre-existing mental health  
33 problems which were not addressed by his clinicians. He attended two different clinics and was on  
34 the verge of dropping out of care when, as he recounted: “*I basically rescued myself*”. His friend  
35 recommended a clinician: “*She got me just like that thank god, thank god...I finally found and she*  
36 *was willing to fight my case*”.  
37  
38  
39  
40

41 Another participant, Peter, diagnosed 2009, reported changing HIV clinics within three months of  
42 diagnosis. He recalled a series of mistakes, miscommunication and a “dehumanising” clinic  
43 environment. Losing trust in clinicians and the service, he finally gained confidence from attending a  
44 support group and moved his care:  
45  
46  
47

48 *“I remember that I said, it was like falling off a building... I’m slowly falling backwards as the*  
49 *virus increases. It felt like they were holding a blanket at the bottom to catch me but it felt*  
50 *like they were holding it in the wrong place. I was being asked to trust”* (gen3, MSM)  
51  
52  
53  
54  
55  
56  
57

1  
2  
3 All participants valued continuity of care although two recently diagnosed felt that it was not always  
4 necessary to see the same clinician. But, continuity was affected by what some described as the very  
5 busy clinics limiting the time for consultations and impeding communication.  
6  
7

8 All participants were in care at the time of the interview but some described having stayed away in  
9 the past. Two of six women diagnosed before 1996 had dropped out of care for several years. Given  
10 the lack of effective treatment, they had found clinic visits depressing and preferred to keep away  
11 until they became sick. Marie (gen1, woman) explained, *"I didn't want a life where I just would go to*  
12 *tests and I am scared and they had nothing to offer"*. Alison (gen1, woman) described the *"terrible*  
13 *situation"* at the clinic, where she saw young gay men, couples, where one would be fit and the  
14 other *"in a wheelchair, a skeleton"*. She felt sorry for the doctors - *"there were all these poor young*  
15 *doctors with nothing to offer and seeing these very ill people."*  
16  
17  
18  
19  
20

21 Seven of all those diagnosed since ARTs became available described occasional or multiple lapses in  
22 attendance; these were generally explained by issues external to the clinic such as recreational drug  
23 use, household disruption, mental health problems or competing co-morbidities. Re-engagement  
24 with care was easier when their clinician actively reached out; for example, some consultants had  
25 telephoned patients when they missed appointments and one woman (gen1) described  
26 interventions of this kind as being *"like my family"*. Even though not all patients were contacted  
27 when they did not attend services, and one expressed surprise that no-one had tried, all found their  
28 way back into care.  
29  
30  
31  
32  
33  
34  
35

### 36 **"Becoming medicalised": Starting treatment**

37

38 Almost all (48) of the participants were on treatment; one had stopped medication because of drug  
39 interactions and three chose to remain off treatment. Despite the simplification of regimens,  
40 participants in all four generations found the decision to start treatment a significant life event.  
41  
42

43 For earlier generations, the decision had been complex because of toxicity related to ARTs. Some  
44 refused treatment contrary to medical advice. Alison, described earlier, recalled, *"In the waiting*  
45 *rooms people said, 'don't take it, it will kill you', so I refused that (AZT)"*. Others felt well without  
46 treatment like Marie who was diagnosed in 1986 but only started ARTs 25 years after diagnosis  
47 when her CD4 count crashed. She felt she had no choice, *"I fought it all this time on my own, and*  
48 *then finally I had to give in and take a pill. That was kind of depressing"*.  
49  
50  
51  
52  
53  
54  
55  
56  
57



1  
2  
3 Those diagnosed more recently found it easier to decide to begin treatment, but it was still a  
4 significant moment. Tim, diagnosed in 2012, was aware of the latest research and asked to start  
5 treatment immediately, even for him, the ‘treatment appointment’ was a sobering experience:  
6

7  
8 *“[It was] the only time there was a tear. I just thought, God this is a new chapter now. This is*  
9 *a new chapter in my life. I am going to have to take this pill for the rest of my life”.* (, gen 3  
10 MSM)  
11

12  
13 Brian, diagnosed in 2013, sums up some of the issues that participants said they had considered  
14 when deciding to start medication:  
15

16  
17 *“Well the impact it would have on my life, the damage it would do to my body. Would I cope*  
18 *with the medication? Would I be able to continue working? Because so many people have*  
19 *side effects initially and it takes them a long time to get over. I had a lot of responsibility at*  
20 *work and I couldn’t actually manage responsibility well enough once on medication. Would I*  
21 *be able to take the medication on time? Would life’s pressures allow me to do what I needed*  
22 *to do? And so on”* (gen 4, MSM)  
23  
24  
25  
26

27 The three participants not on treatment described feeling healthy and wished to remain drug free  
28 for as long as possible.  
29

30  
31 For many participants, HIV occupied only a small part of their lives but daily medications proved to  
32 be a constant reminder of their status even if only for a moment each day. Martin, diagnosed in  
33 2014, described his relationship with his medication:  
34  
35

36 *“It’s strange sometimes because you look at this pill and you think between you and this little*  
37 *pill lies – it’s keeping you alive. And I have never had a pill to take like that before. So, it’s*  
38 *very strange. It’s my friend and foe at the same time”* (gen 4, MSM)  
39  
40  
41  
42  
43

## 44 DISCUSSION

45 We have found that patients’ experiences of, and engagement with, care are influenced by the point  
46 at which they were diagnosed, with the earliest cohorts facing substantial challenges. However, we  
47 have also found that being diagnosed with HIV and starting treatment continue to be significant life-  
48 altering events even in the era of effective and simple treatments. This study brings new insights  
49 which are important when considering how future services should be provided.  
50  
51

52  
53 The revolution in HIV treatment over three decades means it can now be described as a chronic,  
54 manageable condition.(7, 8) In our study, all our patients were virally suppressed having passed  
55  
56  
57

1  
2  
3 through all the stages of the continuum and arrived on the other side. However, patients' recall of  
4 their experience of navigating this journey revealed a range of quite complex issues faced by them at  
5 different points, reminding us that many challenges remain in the successful provision of HIV care.  
6 We hypothesized that the revolution in treatment would have an impact on the experience of the  
7 different diagnostic generations moving through the care continuum, with those diagnosed more  
8 recently having a smoother journey. We identified some important differences; the visible illness  
9 and deaths from AIDS made it harder for earlier generations to engage with or remain in care and  
10 some dropped out, returning only when ill. Decisions about treatment were particularly difficult for  
11 the early generations, for whom the association of treatment with severe side effects remained  
12 strong until more recently and who expressed pride in, and determination to, remaining well  
13 without treatment.  
14  
15  
16  
17  
18  
19

20  
21 However, our primary finding was a striking similarity across participants' accounts of key stages of  
22 the HIV care continuum: diagnosis was a major, traumatic life event for almost everyone, and  
23 anticipation of an HIV-positive status affected the timing of testing and diagnosis. Engagement with  
24 care was facilitated by a responsive, flexible approach on the part of services and clinicians, starting  
25 with the way the positive diagnosis was handled. Finally, initiating treatment was a major life  
26 decision even when recommended by protocol and considered straightforward by clinicians.  
27  
28  
29  
30

31  
32 Despite the drive to normalise HIV testing through simplified sampling, reduced pre-test discussion  
33 and expanded test settings,(9, 10) (11) receiving an HIV diagnosis remained a significant shock for  
34 most participants irrespective of generation, sexuality or gender, as suggested elsewhere.(12-15)  
35 Moreover, we found that none of the heterosexual participants were expecting a positive result, a  
36 finding which also applied to some of the MSM participants. Resonating with other studies.(13, 16,  
37 17) , we found that fear of imminent death and experience of profound distress did not change,  
38 despite the availability of effective and less toxic treatments. This fear, often coupled with a fear of  
39 social exclusion and rejection, led some MSM participants who suspected they were positive to  
40 delay testing.(18) Bury (1982) usefully describes this experience of illness and especially chronic  
41 illness as "biographical disruption". When everyday life and its meanings are turned upside down,  
42 relationships and social networks are disrupted and plans for the future have to be re-examined.  
43 (19) Participants described this type of disruption at diagnosis, whether HIV was considered an acute  
44 infection or a chronic condition.  
45  
46  
47  
48  
49  
50

51  
52 A clinician's approach to a patient with a positive result is considered critical to patients' experiences  
53 and may be more important than other aspects of the testing process.(12, 15, 17, 20, 21) We found  
54 that negative experiences at this critical point affected immediate well-being and further contact  
55  
56  
57

1  
2  
3 with services. The impact of those initial encounters, both good and bad, left participants with  
4 lasting impressions throughout their journey, thus demonstrating the importance of establishing  
5 trust between clinician and patient as a firm foundation for good retention in care.(22-24) Women, a  
6 minority in the clinics and, in our sample mainly from the earlier generations, faced particular  
7 challenges in engaging in care. This made the establishment of a trusting relationship with their  
8 clinician all the more important to managing their quality of life with HIV. Moreover, the importance  
9 of that relationship for participants was underlined by their willingness to change their treatment  
10 centre until they found what they perceived as a good clinician/patient relationship. The UK policy of  
11 open access to any clinic through self-referral may be another explanation for high levels of  
12 retention in care.  
13  
14  
15  
16  
17  
18

19 The prospect of treatment for life, to sustain life, was a major life event. Currently the moves  
20 towards starting treatment at diagnosis, the test-and-treat model, is based on the confidence of  
21 biomedicine in HIV management, but may be at odds with patient concerns.(25) British HIV  
22 Association (BHIVA) interim guidelines 2016 recommend starting treatment on all diagnosed with  
23 HIV regardless of CD4 count and continue to recognise that social, psychological, cultural, and  
24 economic factors can adversely affect adherence and treatment outcomes.(26) Starting medication  
25 on the same day as, or soon after, diagnosis when individuals may be distressed by the positive  
26 result could preclude a meaningful discussion of the patient's 'readiness to start'. Persson's 2016  
27 study of patients not on ARTs found similar barriers and concerns: for example, logistics of starting  
28 life-long medication, fear of long term side effects and desire to stay drug-free whilst healthy.(27)  
29  
30 Considering ARTs was another point at which some participants anticipated 'biographical disruption'  
31 which deterred them from starting treatment.  
32  
33  
34  
35  
36  
37  
38

39 The study's strengths are in the large number of participants at two different clinics, the inclusion of  
40 a range of people with HIV broadly similar to the cohorts seen at these clinics, and diagnosed across  
41 the four generations. The semi-structured interview format allowed us to explore factors important  
42 to participants rather than asking about pre-defined concerns. However, our study sample was  
43 imbalanced between generations, with larger numbers of women in the earliest two generation and  
44 only one of those more recently diagnosed. This means that some of our conclusions about  
45 generation may also reflect gendered differences. Our recruitment methods that relied on  
46 recruitment from the two clinics meant we were not able to explore the experiences of those who  
47 remain outside care. The study is also limited by the single interview format which meant people  
48 were having to recall past experiences, some of which were three decades ago. This may have  
49 introduced recall bias with subsequent experience colouring earlier reports; moreover, earlier  
50  
51  
52  
53  
54  
55  
56  
57

1  
2  
3 generations had more time to have disengaged and re-engaged with care. The focus of the study on  
4 a particular model of care in London limits the generalisability of our findings to other settings.  
5

6 The evolution of simpler treatments has been accompanied by a reconfiguration of the care  
7 pathway. In London, HIV clinics are increasingly narrowly focused on HIV and HIV-specific  
8 medications and clinicians are not authorised to provide more holistic medical care.(28) In practice,  
9 this has led to less frequent clinic visits, a shift to virtual “e-clinics”, and greater links with, and  
10 reliance on, general practitioners. The impact of this on the care continuum is unclear. Continuity of  
11 clinician, the atmosphere in the clinic and good communication are recognised to be key issues for  
12 patients. (29, 30)  
13

14 There is increasing recognition that viral suppression is not the final goal for people who are now  
15 living longer with HIV.(31-33) Lazarus et al (2016) have called for a ‘fourth 90’ “providing an explicit  
16 target for health- related quality of life”(31). In December2017 these concerns were embodied in  
17 policy recommendations from the European Parliament calling for an integrated and patient-centred  
18 approach to long term HIV care ensuring that services are meeting this challenge. (34) Our study  
19 illustrates that the patient journey is complex and personalised care should not be lost with  
20 streamlining pathways. All our participants were virally suppressed but that can hide the reality of  
21 their reliance on the caregivers to help maintain that stability.  
22  
23  
24  
25  
26  
27  
28  
29  
30

31 A personal, holistic approach has been a hallmark of HIV care since the beginning of the epidemic. It  
32 is important that major advances in biomedical treatment do not undermine the care continuum  
33 through a loss of care that meets the complex needs of patients, for whom HIV diagnosis and  
34 treatment remain significant challenges requiring supportive and flexible care.  
35  
36  
37  
38  
39  
40  
41  
42  
43  
44  
45  
46  
47  
48  
49  
50  
51  
52  
53  
54  
55  
56  
57

1  
2  
3  
4  
5 **Acknowledgements:** Thanks to participants for sharing their time and stories, to Jane Rowlands and  
6 Chris Higgs for conducting some of the interviews and the staff of both clinics for facilitating the  
7 study.  
8  
9

10 **Contributorship statement:** All four authors, J. Bruton, T. Rai, S. Day and H. Ward, were involved in  
11 the design of the study. J. Bruton and T. Rai completed the initial analysis and interpretation of the  
12 data and subsequent discussion and analysis was undertaken by all 4 authors through team  
13 discussion. J. Bruton completed the first draft of the manuscript. All four authors participated in  
14 critiquing and revising the draft manuscript and all approved the final draft.  
15  
16

17 All four authors accept accountability for the submitted paper.

18 T. Rai and J. Bruton only undertook the interviews alongside collaborators J. Rowlands and C.Higgs.  
19  
20

21 **Funders:** Funded by grants from Imperial NIHR Biomedical Research Centre, P35771, the Imperial  
22 College Healthcare Charity, P44223, and supported by the St Stephens AIDS Trust. No  
23 pharmaceutical grants were received in the development of this study.  
24  
25

26 **Competing Interests:** There are no competing interests  
27  
28

29 **Data sharing statement:** The interview transcripts are anonymised and stored securely at Imperial  
30 College London on a password protected database on a password protected computer. The  
31 participants were assured of the security of their data and they would remain confidential.  
32  
33  
34  
35

## 36 References

- 37 1. Gardner EM, McLees MP, Steiner JF, del Rio C, Burman WJ. The Spectrum of Engagement in  
38 HIV Care and its Relevance to Test-and-Treat Strategies for Prevention of HIV Infection. *Clinical*  
39 *Infectious Diseases*. 2011;52(6):793-800.
- 40 2. UNAIDS. UNAIDS. 90-90-90 - an ambitious treatment target to help end the AIDS epidemic  
41 (accessed June 21, 2017) <http://www.unaids.org/en/resources/documents/2014/90-90-90>. 2014.
- 42 3. Kirwan PD CC, Brown AE., Gill ON., Delpech VC. and contributors. HIV in the UK: 2016 Report.  
43 London: Public Health England; 2016.
- 44 4. Flowers P, Davis MM, Larkin M, Church S, Marriott C. Understanding the impact of HIV  
45 diagnosis amongst gay men in Scotland: an interpretative phenomenological analysis. *Psychology &*  
46 *health*. 2011;26(10):1378-91.
- 47 5. Christopoulos KA, Massey AD, Lopez AM, Geng EH, Johnson MO, Pilcher CD, et al. "Taking a  
48 half day at a time:" patient perspectives and the HIV engagement in care continuum. *AIDS patient*  
49 *care and STDs*. 2013;27(4):223-30.
- 50 6. Gale NK, Heath G, Cameron E, Rashid S, Redwood S. Using the framework method for the  
51 analysis of qualitative data in multi-disciplinary health research. *BMC Medical Research*  
52 *Methodology*. 2013;13(1):117.  
53  
54  
55  
56  
57

7. Deeks SG, Lewin SR, Havlir DV. The End of AIDS: HIV Infection as a Chronic Disease. *Lancet*. 2013;382(9903):1525-33.
8. Yehia BR, Gebo KA, Hicks PB, Korthuis PT, Moore RD, Ridore M, et al. Structures of Care in the Clinics of the HIV Research Network. *AIDS patient care and STDs*. 2008;22(12):1007-13.
9. Ogaz D. FM, Connor N., Gill ON. and contributors. HIV testing in England:2016 report. London England: Public Health England; 2016.
10. Rayment M, Thornton A, Mandalia S, Elam G, Atkins M, Jones R, et al. HIV Testing in Non-Traditional Settings – The HINTS Study: A Multi-Centre Observational Study of Feasibility and Acceptability. *PLOS ONE*. 2012;7(6):e39530.
11. Wise J. Guidelines call for HIV testing to be “normalised”. *BMJ*. 2008;337.
12. Roth NL, Nelson MS. HIV diagnosis rituals and identity narratives. *AIDS Care*. 1997;9(2):161-80.
13. Stevens PE, Hildebrandt E. Life changing words: women's responses to being diagnosed with HIV infection. *ANS Advances in nursing science*. 2006;29(3):207-21.
14. Stevens PE, Tighe Doerr B. Trauma of discovery: women's narratives of being informed they are HIV-infected. *AIDS Care*. 1997;9(5):523-38.
15. Anderson M, Elam G, Gerver S, Solarin I, Fenton K, Easterbrook P. "It took a piece of me": initial responses to a positive HIV diagnosis by Caribbean people in the UK. *AIDS Care*. 2010;22(12):1493-8.
16. Meursing K, Sibindi F. HIV counselling — a luxury or necessity? *Health Policy and Planning*. 2000;15(1):17-23.
17. Christopoulos KA, Massey AD, Lopez AM, Hare CB, Johnson MO, Pilcher CD, et al. Patient Perspectives on the Experience of Being Newly Diagnosed with HIV in the Emergency Department/Urgent Care Clinic of a Public Hospital. *PLOS ONE*. 2013;8(8):e74199.
18. Clifton S, Nardone A, Field N, Mercer CH, Tanton C, Macdowall W, et al. HIV testing, risk perception, and behaviour in the British population. *AIDS (London, England)*. 2016;30(6):943-52.
19. Bury M. Chronic illness as biographical disruption. *Sociology of health & illness*. 1982;4(2):167-82.
20. Worthington C, Myers T. Desired elements of HIV testing services: test recipient perspectives. *AIDS patient care and STDs*. 2002;16(11):537-48.
21. Hult JR, Maurer SA, Moskowitz JT. "I'm sorry, you're positive": a qualitative study of individual experiences of testing positive for HIV. *AIDS Care*. 2009;21(2):185-8.
22. Kempf MC, McLeod J, Boehme AK, Walcott MW, Wright L, Seal P, et al. A qualitative study of the barriers and facilitators to retention-in-care among HIV-positive women in the rural southeastern United States: implications for targeted interventions. *AIDS patient care and STDs*. 2010;24(8):515-20.
23. Yehia BR, Stewart L, Momplaisir F, Mody A, Holtzman CW, Jacobs LM, et al. Barriers and facilitators to patient retention in HIV care. *BMC Infectious Diseases*. 2015;15(1):246.
24. Engelhard EA, Smit C, Van Sighem A, Reiss P, Nieuwkerk PT, Kroon FP, et al. Impact of HIV care facility characteristics on the cascade of care in HIV-infected patients in the Netherlands. *AIDS (London, England)*. 2016;30(2):301-10.
25. Newman CE. Appreciating doubts about HIV medicine2015.
26. BHIVA. British HIV Association guidelines for the treatment of HIV-1- positive adults with antiretroviral therapy. 2015 (2016 interim update) 2016.
27. Persson A, Newman CE, Mao L, de Wit J. On the Margins of Pharmaceutical Citizenship: Not Taking HIV Medication in the "Treatment Revolution" Era. *Medical anthropology quarterly*. 2016;30(3):359-77.
28. Miller R. GJ. Commissioning London's HIV Services. *Civitas (Institute for the Study of Civil Society)*; 2011.
29. Weatherburn P. KP, Reid D., Hammond G., Jessup K. My care I care: A study of what people with HIV value about NHS HIV Services across London. *Sigma Research*; 2013.

- 1  
2  
3 30. Haggerty JL, Reid RJ, Freeman GK, Starfield BH, Adair CE, McKendry R. Continuity of care: a  
4 multidisciplinary review. *BMJ: British Medical Journal*. 2003;327(7425):1219.
- 5 31. Lazarus JV, Safreed-Harmon K, Barton SE, Costagliola D, Dedes N, del Amo Valero J, et al.  
6 Beyond viral suppression of HIV – the new quality of life frontier. *BMC Medicine*. 2016;14(1):94.
- 7 32. Highlights from the BHIVA Satellite Symposium, IAS Conference, Paris, France, July 2017:  
8 ‘Tougher times: adapting to increasing demand with declining resources’. *Journal of Virus*  
9 *Eradication*. 2017;3(4):250-2.
- 10 33. Martel K CJ, Auberbach J. Looking Beyond Viral Suppression: Findings from The Well  
11 Project's User Survey on Factors Influeincing the Health, Well-being, and Quality of Life of Women  
12 Living with HIV [IAS 2017 Poster]. 2017 [Available from: <http://www.thewellproject.org/news-press/looking-beyond-viral-suppression-findings-well-project%E2%80%99s-2016-user-survey-factors>].
- 13  
14  
15 34. HIV Outcomes, Beyond Viral Suppression. Recommendations Launched at the European  
16 Parliament. 2017 [cited 03/01/2018]. [cited 03/01/2018]. Available from:  
17 [http://hivoutcomes.eu/wp-content/uploads/2017/11/HIV\\_Booklet\\_FINAL-DIGITAL-version.pdf](http://hivoutcomes.eu/wp-content/uploads/2017/11/HIV_Booklet_FINAL-DIGITAL-version.pdf).
- 18  
19  
20  
21  
22  
23  
24  
25  
26  
27  
28  
29  
30  
31  
32  
33  
34  
35  
36  
37  
38  
39  
40  
41  
42  
43  
44  
45  
46  
47  
48  
49  
50  
51  
52  
53  
54  
55  
56  
57

## Key statements

- A qualitative study understanding the patients' perspective of their experience of the HIV care continuum
- The diverse study cohort spans 4 'generations' diagnosed at different time points between 1986 and 2014 reflecting the evolution of ARTs
- There are striking similarities of experience and significance at key points on the continuum: diagnosis, engaging in care and starting treatment
- Despite advances of biomedical treatment clinical services should continue to recognise the needs of patients for whom HIV diagnosis and treatment remains a significant challenge

peer review only



## HIV patient interview topic guide

### **Overview description (recap and summary of information in the patient information sheet)**

During this project we wish to find out people's own experiences of their life with HIV starting from the beginning, before you were diagnosed and going all the way up to the present. There are some specific areas we wish to cover, however you are free to discuss what you feel are important issues or areas that have been relevant in your HIV journey.

#### **Questions:**

*[May or may not need to ask all the questions specifically, this is just a guide, some questions overlap]*

#### **1. Personal information – work/relationships/home situation**

Can you tell me a bit about yourself...

- a. What are your home circumstances?
- b. Are you in a relationship/s?
- c. Do you have dependents children? Parents? partner ?
- d. Do you work? What do you do? Benefits?

#### **2. Testing decisions**

- a. Can you tell me when you were diagnosed?
- b. How did you come to be tested?
- c. Where did you go for your test? Why?
- d. Had you had HIV tests before, if so why?
- e. What was your health like before your diagnosis?
- f. Had/did you know anybody living with HIV at the time?

#### **3. Experience of initial care**

- a. What happened when you were given your positive result?
- b. Can you remember what information you were given at the time? Was this given in the way you wanted? Please can you tell me in detail.
- c. What questions, if any, did you have for the clinical staff? Did you ask them?

- 1  
2  
3 d. Did you tell anyone / talk to anyone after you found out your results? Can you tell me a  
4 bit more about this – who were they, was it helpful to talk to them, etc.?  
5 e. Did you access information about HIV? How? where? How has this helped?  
6 f. What did you do after receiving your diagnosis?  
7 g. Which HIV clinic did you go to? Why? Are you still at that clinic? Why?  
8  
9  
10  
11

#### 12 4. Treatment decisions and research

- 13  
14 a. Are you on treatment ?  
15 b. How was the decision to start taken? Were you involved in that decision?  
16 c. What preparation did you make?  
17  
18 d. (If not on treatment) What are your thoughts about going on treatment?  
19  
20 (If on treatment) What do you think / have you any thoughts about being on treatment?  
21  
22  
23 e. (If on treatment) How do you find taking your medication?  
24  
25  
26 f. Have you discussed your thoughts about treatment with anyone?  
27  
28 g. Do you know what recommendations there are for when people might start treatment?  
29  
30  
31 h. Are you aware of the research into ARVs and treatment guidelines in the UK?  
32 i. What do you know about them? What do you think of them?  
33 j. How have they influenced your understanding of treatment?  
34 k. Have they influenced your decision to start/change/stop treatment?  
35  
36  
37 l. Do you take part in clinical trials? Why?  
38  
39  
40  
41

#### 42 5. Clinical care

- 43  
44 a. How often do you go to the clinic? Has that changed over the time you have been in the  
45 clinic? How?  
46 b. Who do you see? And for what? Doctor? Consultant? Nurse? Peer support? Health  
47 Advisor? etc  
48 c. What kind of care have you received at the clinic? Any good/bad experiences?  
49  
50  
51 d. What do you think the role of the clinic is in your care?  
52 e. What other clinical services do you access? Where? How is your care coordinated?  
53 f. What do you think about the way in which HIV services are currently organised? Does it  
54 work for you?  
55 g. Have they changed? In what way?  
56 h. Are you aware of possible future changes in the services?  
57  
58  
59  
60

1  
2  
3 **6. Primary care /Community and Social care**  
4  
5

- 6 a. Where do you go for your primary care needs? Why? What is your experience of primary  
7 care?  
8 b. How is your care coordinated between primary care and the clinic?  
9 c. Do you access any social care or voluntary services? If so what? Why?  
10 d. Do they meet your needs? If not why?  
11 e. Have you seen any changes in what is available? If so what?  
12  
13  
14  
15

16 **7. Living with HIV**  
17

- 18 a. Has having HIV affected your life? What are the most significant ways HIV has affected  
19 your life, and has that changed over time?  
20 b. Do you know others living with HIV? What impact does that have on your life?  
21 c. What kind of support have you had/needed since you were diagnosed positive? Has this  
22 changed over time?  
23  
24  
25  
26  
27

28 **8. Is there anything else you would like to say?**  
29

- 30 a. Given your experience of living with HIV, what would you say to others who have been  
31 recently diagnosed about what to expect?  
32  
33  
34  
35  
36  
37  
38  
39  
40  
41  
42  
43  
44  
45  
46  
47  
48  
49  
50  
51  
52  
53  
54  
55  
56  
57  
58  
59  
60

## COREQ (COnsolidated criteria for REporting Qualitative research) Checklist

A checklist of items that should be included in reports of qualitative research. You must report the page number in your manuscript where you consider each of the items listed in this checklist. If you have not included this information, either revise your manuscript accordingly before submitting or note N/A.

| Topic                                          | Item No. | Guide Questions/Description                                                                                                                              | Reported on Page No. |
|------------------------------------------------|----------|----------------------------------------------------------------------------------------------------------------------------------------------------------|----------------------|
| <b>Domain 1: Research team and reflexivity</b> |          |                                                                                                                                                          |                      |
| <i>Personal characteristics</i>                |          |                                                                                                                                                          |                      |
| Interviewer/facilitator                        | 1        | Which author/s conducted the interview or focus group?                                                                                                   |                      |
| Credentials                                    | 2        | What were the researcher's credentials? E.g. PhD, MD                                                                                                     |                      |
| Occupation                                     | 3        | What was their occupation at the time of the study?                                                                                                      |                      |
| Gender                                         | 4        | Was the researcher male or female?                                                                                                                       |                      |
| Experience and training                        | 5        | What experience or training did the researcher have?                                                                                                     |                      |
| <i>Relationship with participants</i>          |          |                                                                                                                                                          |                      |
| Relationship established                       | 6        | Was a relationship established prior to study commencement?                                                                                              |                      |
| Participant knowledge of the interviewer       | 7        | What did the participants know about the researcher? e.g. personal goals, reasons for doing the research                                                 |                      |
| Interviewer characteristics                    | 8        | What characteristics were reported about the interviewer/facilitator? e.g. Bias, assumptions, reasons and interests in the research topic                |                      |
| <b>Domain 2: Study design</b>                  |          |                                                                                                                                                          |                      |
| <i>Theoretical framework</i>                   |          |                                                                                                                                                          |                      |
| Methodological orientation and Theory          | 9        | What methodological orientation was stated to underpin the study? e.g. grounded theory, discourse analysis, ethnography, phenomenology, content analysis |                      |
| <i>Participant selection</i>                   |          |                                                                                                                                                          |                      |
| Sampling                                       | 10       | How were participants selected? e.g. purposive, convenience, consecutive, snowball                                                                       |                      |
| Method of approach                             | 11       | How were participants approached? e.g. face-to-face, telephone, mail, email                                                                              |                      |
| Sample size                                    | 12       | How many participants were in the study?                                                                                                                 |                      |
| Non-participation                              | 13       | How many people refused to participate or dropped out? Reasons?                                                                                          |                      |
| <i>Setting</i>                                 |          |                                                                                                                                                          |                      |
| Setting of data collection                     | 14       | Where was the data collected? e.g. home, clinic, workplace                                                                                               |                      |
| Presence of non-participants                   | 15       | Was anyone else present besides the participants and researchers?                                                                                        |                      |
| Description of sample                          | 16       | What are the important characteristics of the sample? e.g. demographic data, date                                                                        |                      |
| <i>Data collection</i>                         |          |                                                                                                                                                          |                      |
| Interview guide                                | 17       | Were questions, prompts, guides provided by the authors? Was it pilot tested?                                                                            |                      |
| Repeat interviews                              | 18       | Were repeat interviews carried out? If yes, how many?                                                                                                    |                      |
| Audio/visual recording                         | 19       | Did the research use audio or visual recording to collect the data?                                                                                      |                      |
| Field notes                                    | 20       | Were field notes made during and/or after the interview or focus group?                                                                                  |                      |
| Duration                                       | 21       | What was the duration of the interviews or focus group?                                                                                                  |                      |
| Data saturation                                | 22       | Was data saturation discussed?                                                                                                                           |                      |
| Transcripts returned                           | 23       | Were transcripts returned to participants for comment and/or                                                                                             |                      |

| Topic                                  | Item No. | Guide Questions/Description                                                                                                        | Reported on Page No. |
|----------------------------------------|----------|------------------------------------------------------------------------------------------------------------------------------------|----------------------|
|                                        |          | correction?                                                                                                                        |                      |
| <b>Domain 3: analysis and findings</b> |          |                                                                                                                                    |                      |
| <i>Data analysis</i>                   |          |                                                                                                                                    |                      |
| Number of data coders                  | 24       | How many data coders coded the data?                                                                                               |                      |
| Description of the coding tree         | 25       | Did authors provide a description of the coding tree?                                                                              |                      |
| Derivation of themes                   | 26       | Were themes identified in advance or derived from the data?                                                                        |                      |
| Software                               | 27       | What software, if applicable, was used to manage the data?                                                                         |                      |
| Participant checking                   | 28       | Did participants provide feedback on the findings?                                                                                 |                      |
| <i>Reporting</i>                       |          |                                                                                                                                    |                      |
| Quotations presented                   | 29       | Were participant quotations presented to illustrate the themes/findings?<br>Was each quotation identified? e.g. participant number |                      |
| Data and findings consistent           | 30       | Was there consistency between the data presented and the findings?                                                                 |                      |
| Clarity of major themes                | 31       | Were major themes clearly presented in the findings?                                                                               |                      |
| Clarity of minor themes                | 32       | Is there a description of diverse cases or discussion of minor themes?                                                             |                      |

Developed from: Tong A, Sainsbury P, Craig J. Consolidated criteria for reporting qualitative research (COREQ): a 32-item checklist for interviews and focus groups. *International Journal for Quality in Health Care*. 2007. Volume 19, Number 6: pp. 349 – 357

**Once you have completed this checklist, please save a copy and upload it as part of your submission. DO NOT include this checklist as part of the main manuscript document. It must be uploaded as a separate file.**

# BMJ Open

## Patient perspectives on the HIV continuum of care in London: a qualitative study of people diagnosed between 1986 and 2014

|                                 |                                                                                                                                                                                                                                                                                                                                                                                                         |
|---------------------------------|---------------------------------------------------------------------------------------------------------------------------------------------------------------------------------------------------------------------------------------------------------------------------------------------------------------------------------------------------------------------------------------------------------|
| Journal:                        | <i>BMJ Open</i>                                                                                                                                                                                                                                                                                                                                                                                         |
| Manuscript ID                   | bmjopen-2017-020208.R2                                                                                                                                                                                                                                                                                                                                                                                  |
| Article Type:                   | Research                                                                                                                                                                                                                                                                                                                                                                                                |
| Date Submitted by the Author:   | 14-Feb-2018                                                                                                                                                                                                                                                                                                                                                                                             |
| Complete List of Authors:       | Bruton, Jane; Imperial College London, Department of Infectious Disease Epidemiology<br>Rai, Tanvi; Imperial College London, Department of Infectious Disease Epidemiology<br>Day, Sophie; Imperial College London, Department of Infectious Disease Epidemiology; Goldsmiths University of London, Anthropology<br>Ward, Helen; Imperial College London, Department of Infectious Disease Epidemiology |
| <b>Primary Subject Heading</b>: | HIV/AIDS                                                                                                                                                                                                                                                                                                                                                                                                |
| Secondary Subject Heading:      | Qualitative research, Health services research, Patient-centred medicine                                                                                                                                                                                                                                                                                                                                |
| Keywords:                       | HIV & AIDS < INFECTIOUS DISEASES, QUALITATIVE RESEARCH, PATIENT EXPERIENCE, HIV CARE CONTINUUM                                                                                                                                                                                                                                                                                                          |
|                                 |                                                                                                                                                                                                                                                                                                                                                                                                         |

SCHOLARONE™  
Manuscripts

only

1  
2  
3  
4  
5 **Patient perspectives on the HIV continuum of care in London: a**  
6 **qualitative study of people diagnosed between 1986 and 2014**  
7  
8  
9

10  
11 Jane Bruton RN, BA, MA Medical Anthropology; Tanvi Rai PhD Public Health, MPH, BA, BSc; Sophie  
12 Day, PhD, BA, MA Anthropology; BSc Helen Ward PhD, FRCP, FFPH, MBChB, MSc Epidemiology.  
13

14  
15 Corresponding author:  
16 Pamela Jane Bruton,  
17 Department of Infectious Disease Epidemiology,  
18 School of Public Health,  
19 Imperial College,  
20 St Mary's Campus,  
21 Norfolk Place,  
22 London.  
23 W2 1PG  
24 [jbruton@ic.ac.uk](mailto:jbruton@ic.ac.uk)  
25 0207 5943464  
26

27  
28 Co-authors:  
29 Rai, Tanvi: Imperial College London, Department of Infectious Disease Epidemiology.  
30 Day, Sophie: Imperial College London, Department of Infectious Disease Epidemiology and  
31 Goldsmiths College  
32 Ward, Helen: Imperial College London, Department of Infectious Disease Epidemiology.  
33  
34

35 Word count: Main text 4051  
36  
37  
38  
39  
40  
41  
42  
43  
44  
45  
46  
47  
48  
49  
50  
51  
52  
53  
54  
55  
56  
57

## Abstract

**Objectives:** To describe the experiences of the HIV treatment cascade of diagnosis, engagement with care and initiation of treatment, from the perspective of patients; we explored whether this differed according to the year of their diagnosis, for example whether they had experienced HIV care in the pre-treatment era.

**Design:** Qualitative interview study with framework analysis

**Setting:** Two large HIV adult outpatient clinics in central London.

**Participants:** 52 HIV positive individuals, 41 men, 11 women, purposively sampled to include people who had been diagnosed at different stages in the history of the epidemic classified as four 'generations': pre-1996 (pre-ART), 1997 to 2005 (complex ARTs), 2006 to 2012 (simpler ARTs), 2013 onwards (recent diagnoses).

**Results:** Some important differences were identified; for earlier generations, the visible illness and deaths from AIDS made it harder to engage with care following diagnosis. Subsequent decisions about starting treatment were deeply influenced by the fear of severe side-effects from early antiretroviral therapy (ART). However, despite improvements in ART and life expectancy over the epidemic we found a striking similarity across participants' accounts of the key stages of the care continuum, regardless of when they were diagnosed. Diagnosis was a major traumatic life event for almost everyone, fear of testing positive or having low self-perceived risk affected the timing of testing and diagnosis, engaging with care was facilitated by a flexible approach from services/clinicians and initiating treatment was a major life decision.

**Conclusion:** We found patients' experiences are influenced by when they were diagnosed, with earliest cohorts facing substantial challenges. However, being diagnosed with HIV and starting treatment continue to be significant life-altering events even in the era of effective, simple treatments. Despite the advances of biomedical treatment services should continue to recognise the needs of patients for whom the diagnosis and treatment remain significant challenges.



### Strengths

- The large number of participants, at two different clinics and the inclusion of a range of people with HIV, broadly similar to the clinic cohorts, across four HIV 'generations'.
- The interview format allowed us to explore factors important to participants rather than asking about pre-defined concerns.

### Limitations

- An imbalance between generations, with larger numbers of women in the earliest two generations and only one woman in the generation recently diagnosed. This means that some of our conclusions about generations may also reflect gendered differences.
- Our recruitment methods meant we were not able to explore the experiences of those who remain outside care.
- Limitation of the single interview format means people were having to recall past experiences, some of which were three decades ago. This may have introduced recall bias with subsequent experience colouring earlier reports.

## INTRODUCTION

The Human Immunodeficiency Virus (HIV) continuum of care provides stepwise estimates for the stages of engagement in care for people living with HIV (PLHIV).(1) The Joint United Nations Programme on HIV and AIDS (UNAIDS) goal to end the Acquired Immune Deficiency Syndrome (AIDS) epidemic by 2020 stipulates a target of 90% of all people with HIV be diagnosed, of whom 90% are on antiretroviral therapy (ART), of whom 90% (73% of PLHIV) are virally suppressed.(2) The United Kingdom (UK) has one of the best outcomes for HIV treatment and care in the world with an estimated 78% of PLHIV having an undetectable viral load.(3, 4) However the statistics do not and cannot tell us about the patient experience of passing through these stages of care whether it be good or bad. The continuum essentially measures the success of programmes from a provider rather than a patient perspective.(5)

Flowers argues that there is a tension between the certainty and confidence of a linear HIV pathway, associated with ideas of clinical efficacy, and patient experiences of diagnosis and prognosis, which can be full of uncertainty.(4) With the evolution of modern ARTs we have witnessed the transformation of HIV from an acute life-threatening infection to a treatable chronic condition and a concurrent evolving of the care continuum. However, it is unclear whether this change is reflected in patients' own experiences of passing through each of the stages of care. For example, has the moment of diagnosis become any less traumatic, and have decisions about starting treatment become simpler for patients? Analysis of patient narratives, historically and currently, may help to highlight significant factors for patients in the care continuum. This is particularly important in a climate of National Health Service (NHS) restructuring in the UK, which has led to reductions in non-clinical services and streamlining of care. To this end we explored the patient perspectives on the care continuum. And we hypothesized that patients' experiences of, and engagement with, care would differ according to what point in the epidemic they were diagnosed.

## METHODS

We undertook a qualitative study of people attending two public HIV clinics in London that have provided care since the start of the epidemic; they were also chosen for their large size and diversity, in terms of demographics. They are both specialist HIV clinics linked to sexual health (genitourinary medicine) services. Care is provided by physician-led multidisciplinary teams where patients have a named consultant. HIV care in the UK is free and open access, allowing patients to register at their clinic of choice. We used a purposive sampling method to recruit patients with a range of experiences. To reflect the evolution of ART, we identified four 'generations' according to time of diagnosis: pre-1996 (pre-ART), 1997 to 2005 (complex ARTs), 2006 to 2012 (simpler ARTs), 2013

onwards (recent diagnoses). Within each generation, we aimed to include people with a range of characteristics, including, gender, exposure, age and ethnicity. Participants were recruited opportunistically by researchers attending clinical services, and through fliers and digital advertising in clinical areas. Recruitment was periodically checked against the recruitment matrix and under-represented groups/strata targeted.

Patients were provided with information and gave written consent. Interviews took place in private rooms in or near the clinics or at the patient's home; they were recorded and transcribed, and lasted between 60 and 90 minutes. The interviews were semi-structured and carried out by one male (CH) and three female researchers (JB, TR, JR), three of whom had clinical backgrounds. The interviews were based on a topic guide (see supplementary file) informed by a focus group of PLHIV who assisted in designing the research. We invited participants to recall their initial diagnosis and describe key points in their HIV journey including testing, disclosure, support, engaging with care, starting treatment, medication adherence, work and social life. Field notes were written after the interviews.

Transcripts were uploaded to NVivo, a qualitative data analysis software package. Using Framework analysis, we developed key themes through a systematic process which involved reading, rereading, coding and summarising the transcripts; and subsequent in-depth analysis of the dataset.<sup>(6)</sup> Final themes were discussed in the research group (HW, JB, SD, TR) and further analysed in relation to the existing literature.

Ethical approval was obtained from the National Research Ethics Service (NRES) (reference number 14/WM/0147) in May 2014, and research governance approval obtained from the local sites.

## RESULTS

Fifty-two patients were recruited, 25 at one clinic and 27 at the other. The sample included 41 men and 11 women; 37 men acquired HIV through sex with other men (MSM), the rest through heterosexual contact (n=14) or injection drug use (n=1). There were 11 in generation 1, 14 generation 2, 17 generation 3 and 10 generation 4. The characteristics of the study participants alongside those of the clinic population for 2014 are shown in Table 1.

**Table 1. Study sample characteristics compared with the clinic cohorts**

|               | Clinic A     |       |             |       | Clinic B     |       |             |       |
|---------------|--------------|-------|-------------|-------|--------------|-------|-------------|-------|
|               | Study sample |       | 2014 Cohort |       | Study sample |       | 2014 Cohort |       |
| <b>Gender</b> |              |       |             |       |              |       |             |       |
| Male          | 18           | 72.0% | 2459        | 77.5% | 23           | 85.2% | 7743        | 90.3% |
| Female        | 7            | 28.0% | 715         | 22.5% | 4            | 14.8% | 830         | 9.7%  |

|                          |    |       |             |       |    |       |             |       |  |
|--------------------------|----|-------|-------------|-------|----|-------|-------------|-------|--|
| <b>Age</b>               |    |       |             |       |    |       |             |       |  |
| 18-24                    | 0  | 0.0%  | 124         | 3.9%  | 0  | 0.0%  | 186         | 2.2%  |  |
| 25-34                    | 4  | 16.0% | 465         | 14.7% | 3  | 11.1% | 1729        | 20.2% |  |
| 35-49                    | 16 | 64.0% | 1502        | 47.3% | 14 | 51.9% | 4164        | 48.6% |  |
| 50+                      | 5  | 20.0% | 1083        | 34.1% | 10 | 37.0% | 2494        | 29.1% |  |
| <b>Ethnicity</b>         |    |       |             |       |    |       |             |       |  |
| White                    | 14 | 56.0% | 1541        | 48.6% | 22 | 81.5% | 6401        | 74.7% |  |
| Black African            | 5  | 20.0% | 720         | 22.7% | 5  | 18.5% | 778         | 9.1%  |  |
| Black Caribbean          | 0  | 0.0%  | 114         | 3.6%  | 0  | 0.0%  | 201         | 2.3%  |  |
| Other/Mixed              | 6  | 24.0% | 746         | 23.5% | 0  | 0.0%  | 1132        | 13.2% |  |
| Not reported             | 0  | 0.0%  | 53          | 1.7%  | 0  | 0.0%  | 61          | 0.7%  |  |
| <b>Exposure route</b>    |    |       |             |       |    |       |             |       |  |
| Sex between men          | 15 | 60.0% | 1971        | 62.1% | 22 | 81.5% | 6776        | 79.0% |  |
| Heterosexual contact     | 9  | 36.0% | 1037        | 32.7% | 5  | 18.5% | 1209        | 14.1% |  |
| Injecting drug use       | 1  | 4.0%  | 52          | 1.6%  | 0  | 0.0%  | 109         | 1.3%  |  |
| Other                    | 0  | 0.0%  | 112         | 3.5%  | 0  | 0.0%  | 46          | 0.5%  |  |
| Undetermined             | 0  | 0.0%  | 2           | 0.1%  | 0  | 0.0%  | 433         | 5.1%  |  |
| <b>Year of diagnosis</b> |    |       |             |       |    |       |             |       |  |
| Pre-1997                 | 6  | 24.0% | 638         | 20.1% | 5  | 18.5% | 1399        | 16.3% |  |
| 1997-2005                | 6  | 24.0% | 1234        | 38.9% | 8  | 29.6% | 2580        | 30.1% |  |
| 2006-2012                | 7  | 28.0% | 986         | 31.1% | 10 | 37.0% | 3199        | 37.3% |  |
| 2013 onwards             | 6  | 24.0% | 316         | 10.0% | 4  | 14.8% | 1395        | 16.3% |  |
| <b>Total</b>             |    |       | <b>3174</b> |       |    |       | <b>8573</b> |       |  |

The generation samples differed somewhat by gender and acquisition: the women were concentrated in generations 1 and 2 (n=6 and 4, respectively), and MSM in generations 3 and 4 (n=16 and 8, respectively).

#### **“Becoming positive” – the impact of HIV diagnosis**

The experience of receiving an HIV diagnosis was similar across the generations. First reactions were generally of shock and fear of death, irrespective of generation. Alan (pseudonym), diagnosed in 1991, knew nothing about HIV and had not tested before. He remembers vividly the time he received his result:

*“I could hear myself saying ‘I’m going to die’. Not verbally but in my mind, ‘I’m going to die, I’m going to die’” (gen1, MSM)*

1  
2  
3 Sylvia, diagnosed 2001, was “totally devastated”:

4  
5 *“... I didn’t see myself going back and doing my Master’s degree for what reason am I going*  
6 *back to do that if I have maybe five years to live”* (gen 2, woman)  
7

8 Roger, diagnosed more than 20 years later, reported several previous tests and considered himself  
9 well-informed. However, his principal concern on receiving a positive diagnosis was also about life  
10 expectancy:  
11

12  
13 *“But even I was not certain. Certainty is the wrong word. I was under the illusion that my*  
14 *expiry date was stamped on me now”* (gen4, MSM)  
15  
16

17 Fear of a positive result was a key factor in delayed diagnosis for several MSM in all generations,  
18 who reported concerns about the impact of HIV on their lives. They were aware of their risk, and  
19 described feeling relieved at diagnosis as HIV had been “*hanging over them*” for years; the diagnosis  
20 confirmed their suspicions. William, who had never tested before, presented with symptoms:  
21  
22

23  
24 *“[I had been] burying my head in the sand. I guess I knew I had it but didn’t, at the same*  
25 *time, want it confirmed”* (gen2, MSM)  
26  
27

28 Brian (Gen4, MSM), recently diagnosed, had “*spent on and off probably eight years thinking about*  
29 *it*” He felt he had “*done all the thinking before*” ... so although disappointed, he was also relieved.  
30

31 Most other participants, particularly heterosexual men and women, were not expecting a positive  
32 result and had not requested an HIV test. They were diagnosed either following ongoing symptoms  
33 of ill health or having presented for a general sexual health check-up.  
34  
35

36 None of the women had been diagnosed during pregnancy; most were diagnosed before ante-natal  
37 screening became routine in the UK (1999). For example, Olivia, diagnosed in 1998, had not been  
38 tested in pregnancy. Her six-month old baby became sick, and both baby and husband were then  
39 diagnosed with HIV but she did not believe she had HIV and delayed testing for several weeks  
40  
41

42 *“Me I don’t have HIV because I never went with other men”* (gen2, woman)  
43

44 The response and level of support offered by clinicians at this critical time were important to  
45 participants’ immediate wellbeing and influenced what happened next, including continuing  
46 engagement in care. Martha remarked:  
47  
48

49 *“I remember how lovely [name of clinician] was and I’ve always said I could never wish for a*  
50 *better person to ever tell me or try to guide me, or to reassure me more than what she did*  
51 *because she was perfect”* (Gen4, woman)  
52  
53

54 While most experiences were positive, there were some exceptions. Paul (gen3, MSM) had regularly  
55 tested negative but continued to take risks. Testing positive in 2010 was totally unexpected, leaving  
56  
57

1  
2  
3 him “*numb with shock*”, and he did not feel that he was supported appropriately. The clinician who  
4 gave him the diagnosis seemed “[to be on] *autopilot because he had seen people like me before*” and  
5 was “*working to his own agenda*”. Despite Paul’s obvious distress, the clinician asked him to ring  
6 potential contacts during the consultation. Further, when the clinician said: “*Oh this can be*  
7 *managed, don’t worry*”, Paul interpreted this to mean ‘managed to his death’. After two weeks of  
8 acute anxiety, Paul contacted a friend who was able to reassure him about treatment and the care  
9 pathway. Similar experiences led other participants to feel vulnerable, isolated and slow to accept  
10 their diagnosis.  
11  
12  
13  
14  
15  
16  
17

### 18 **“Becoming an HIV patient”: Developing a relationship with clinic and clinician**

19  
20 Once diagnosed, participants described a sense of reassurance about being in the “best hands”,  
21 managed by experts in HIV medicine. The majority across the generations described strong  
22 relationships with their clinicians and valued seeing the same person each visit. It felt “*like a*  
23 *partnership*” with “*someone you can tell anything*”, who knew them and their entire history,  
24 ensuring that care went beyond just the clinical management of HIV: “*We seriously talk about how I*  
25 *am not just what my CD4 count is*”.  
26  
27  
28  
29

30 However, some had not developed a trusting relationship. Marty (gen3, MSM), for example,  
31 diagnosed HIV in 2012, was not eligible for treatment under guidelines at that point. He described  
32 anxiety about this lack of treatment, feeling that it adversely affected pre-existing mental health  
33 problems which were not addressed by his clinicians. He attended two different clinics and was on  
34 the verge of dropping out of care when, as he recounted: “*I basically rescued myself*”. His friend  
35 recommended a clinician: “*She got me just like that thank god, thank god...I finally found and she*  
36 *was willing to fight my case*”.  
37  
38  
39  
40

41 Another participant, Peter, diagnosed 2009, reported changing HIV clinics within three months of  
42 diagnosis. He recalled a series of mistakes, miscommunication and a “dehumanising” clinic  
43 environment. Losing trust in clinicians and the service, he finally gained confidence from attending a  
44 support group and moved his care:  
45  
46  
47

48 *“I remember that I said, it was like falling off a building... I’m slowly falling backwards as the*  
49 *virus increases. It felt like they were holding a blanket at the bottom to catch me but it felt*  
50 *like they were holding it in the wrong place. I was being asked to trust”* (gen3, MSM)  
51  
52  
53  
54  
55  
56  
57

1  
2  
3 All participants valued continuity of care although two recently diagnosed felt that it was not always  
4 necessary to see the same clinician. But, continuity was affected by what some described as the very  
5 busy clinics limiting the time for consultations and impeding communication.  
6  
7

8 All participants were in care at the time of the interview but some described having stayed away in  
9 the past. Two of six women diagnosed before 1996 had dropped out of care for several years. Given  
10 the lack of effective treatment, they had found clinic visits depressing and preferred to keep away  
11 until they became sick. Marie (gen1, woman) explained, *"I didn't want a life where I just would go to*  
12 *tests and I am scared and they had nothing to offer"*. Alison (gen1, woman) described the *"terrible*  
13 *situation"* at the clinic, where she saw young gay men, couples, where one would be fit and the  
14 other *"in a wheelchair, a skeleton"*. She felt sorry for the doctors - *"there were all these poor young*  
15 *doctors with nothing to offer and seeing these very ill people."*  
16  
17  
18  
19  
20

21 Seven of all those diagnosed since ARTs became available described occasional or multiple lapses in  
22 attendance; these were generally explained by issues external to the clinic such as recreational drug  
23 use, household disruption, mental health problems or competing co-morbidities. Re-engagement  
24 with care was easier when their clinician actively reached out; for example, some consultants had  
25 telephoned patients when they missed appointments and one woman (gen1) described  
26 interventions of this kind as being *"like my family"*. Even though not all patients were contacted  
27 when they did not attend services, and one expressed surprise that no-one had tried, all found their  
28 way back into care.  
29  
30  
31  
32  
33  
34  
35

### 36 **"Becoming medicalised": Starting treatment**

37

38 Almost all (48) of the participants were on treatment; one had stopped medication because of drug  
39 interactions and three chose to remain off treatment. Despite the simplification of regimens,  
40 participants in all four generations found the decision to start treatment a significant life event.  
41  
42

43 For earlier generations, the decision had been complex because of toxicity related to ARTs. Some  
44 refused treatment contrary to medical advice. Alison, described earlier, recalled, *"In the waiting*  
45 *rooms people said, 'don't take it, it will kill you', so I refused that (AZT)"*. Others felt well without  
46 treatment like Marie who was diagnosed in 1986 but only started ARTs 25 years after diagnosis  
47 when her CD4 count crashed. She felt she had no choice, *"I fought it all this time on my own, and*  
48 *then finally I had to give in and take a pill. That was kind of depressing"*.  
49  
50  
51  
52  
53  
54  
55  
56  
57

1  
2  
3 Those diagnosed more recently found it easier to decide to begin treatment, but it was still a  
4 significant moment. Tim, diagnosed in 2012, was aware of the latest research and asked to start  
5 treatment immediately, even for him, the ‘treatment appointment’ was a sobering experience:  
6

7  
8 *“[It was] the only time there was a tear. I just thought, God this is a new chapter now. This is*  
9 *a new chapter in my life. I am going to have to take this pill for the rest of my life”.* (, gen 3  
10 MSM)  
11

12  
13 Brian, diagnosed in 2013, sums up some of the issues that participants said they had considered  
14 when deciding to start medication:  
15

16  
17 *“Well the impact it would have on my life, the damage it would do to my body. Would I cope*  
18 *with the medication? Would I be able to continue working? Because so many people have*  
19 *side effects initially and it takes them a long time to get over. I had a lot of responsibility at*  
20 *work and I couldn’t actually manage responsibility well enough once on medication. Would I*  
21 *be able to take the medication on time? Would life’s pressures allow me to do what I needed*  
22 *to do? And so on”* (gen 4, MSM)  
23  
24  
25  
26

27 The three participants not on treatment described feeling healthy and wished to remain drug free  
28 for as long as possible.  
29

30  
31 For many participants, HIV occupied only a small part of their lives but daily medications proved to  
32 be a constant reminder of their status even if only for a moment each day. Martin, diagnosed in  
33 2014, described his relationship with his medication:  
34  
35

36 *“It’s strange sometimes because you look at this pill and you think between you and this little*  
37 *pill lies – it’s keeping you alive. And I have never had a pill to take like that before. So, it’s*  
38 *very strange. It’s my friend and foe at the same time”* (gen 4, MSM)  
39  
40  
41  
42  
43

## 44 DISCUSSION

45 We have found that patients’ experiences of, and engagement with, care are influenced by the point  
46 at which they were diagnosed, with the earliest cohorts facing substantial challenges. However, we  
47 have also found that being diagnosed with HIV and starting treatment continue to be significant life-  
48 altering events even in the era of effective and simple treatments. This study brings new insights  
49 which are important when considering how future services should be provided.  
50  
51  
52

53 The revolution in HIV treatment over three decades means it can now be described as a chronic,  
54 manageable condition.(7, 8) In our study, all our patients were virally suppressed having passed  
55  
56  
57



1  
2  
3 through all the stages of the continuum and arrived on the other side. However, patients' recall of  
4 their experience of navigating this journey revealed a range of quite complex issues faced by them at  
5 different points, reminding us that many challenges remain in the successful provision of HIV care.  
6 We hypothesized that the revolution in treatment would have an impact on the experience of the  
7 different diagnostic generations moving through the care continuum, with those diagnosed more  
8 recently having a smoother journey. We identified some important differences; the visible illness  
9 and deaths from AIDS made it harder for earlier generations to engage with or remain in care and  
10 some dropped out, returning only when ill. Decisions about treatment were particularly difficult for  
11 the early generations, for whom the association of treatment with severe side effects remained  
12 strong until more recently and who expressed pride in, and determination to, remaining well  
13 without treatment.  
14  
15  
16  
17  
18  
19

20  
21 However, our primary finding was a striking similarity across participants' accounts of key stages of  
22 the HIV care continuum: diagnosis was a major, traumatic life event for almost everyone, and  
23 anticipation of an HIV-positive status affected the timing of testing and diagnosis. Engagement with  
24 care was facilitated by a responsive, flexible approach on the part of services and clinicians, starting  
25 with the way the positive diagnosis was handled. Finally, initiating treatment was a major life  
26 decision even when recommended by protocol and considered straightforward by clinicians.  
27  
28  
29  
30

31  
32 Despite the drive to normalise HIV testing through simplified sampling, reduced pre-test discussion  
33 and expanded test settings,(9, 10) (11) receiving an HIV diagnosis remained a significant shock for  
34 most participants irrespective of generation, sexuality or gender, as suggested elsewhere.(12-15)  
35 Moreover, we found that none of the heterosexual participants were expecting a positive result, a  
36 finding which also applied to some of the MSM participants. Resonating with other studies.(13, 16,  
37 17) , we found that fear of imminent death and experience of profound distress did not change,  
38 despite the availability of effective and less toxic treatments. This fear, often coupled with a fear of  
39 social exclusion and rejection, led some MSM participants who suspected they were positive to  
40 delay testing.(18) Bury (1982) usefully describes this experience of illness and especially chronic  
41 illness as "biographical disruption". When everyday life and its meanings are turned upside down,  
42 relationships and social networks are disrupted and plans for the future have to be re-examined.  
43 (19) Participants described this type of disruption at diagnosis, whether HIV was considered an acute  
44 infection or a chronic condition.  
45  
46  
47  
48  
49  
50

51  
52 A clinician's approach to a patient with a positive result is considered critical to patients' experiences  
53 and may be more important than other aspects of the testing process.(12, 15, 17, 20, 21) We found  
54 that negative experiences at this critical point affected immediate well-being and further contact  
55  
56  
57

1  
2  
3 with services. The impact of those initial encounters, both good and bad, left participants with  
4 lasting impressions throughout their journey, thus demonstrating the importance of establishing  
5 trust between clinician and patient as a firm foundation for good retention in care.(22-24) Women, a  
6 minority in the clinics and, in our sample mainly from the earlier generations, faced particular  
7 challenges in engaging in care. This made the establishment of a trusting relationship with their  
8 clinician all the more important to managing their quality of life with HIV. Moreover, the importance  
9 of that relationship for participants was underlined by their willingness to change their treatment  
10 centre until they found what they perceived as a good clinician/patient relationship. The UK policy of  
11 open access to any clinic through self-referral may be another explanation for high levels of  
12 retention in care.  
13  
14  
15  
16  
17  
18

19 The prospect of treatment for life, to sustain life, was a major life event. Currently the moves  
20 towards starting treatment at diagnosis, the test-and-treat model, is based on the confidence of  
21 biomedicine in HIV management, but may be at odds with patient concerns.(25) British HIV  
22 Association (BHIVA) interim guidelines 2016 recommend starting treatment on all diagnosed with  
23 HIV regardless of CD4 count and continue to recognise that social, psychological, cultural, and  
24 economic factors can adversely affect adherence and treatment outcomes.(26) Starting medication  
25 on the same day as, or soon after, diagnosis when individuals may be distressed by the positive  
26 result could preclude a meaningful discussion of the patient's 'readiness to start'. Persson's 2016  
27 study of patients not on ARTs found similar barriers and concerns: for example, logistics of starting  
28 life-long medication, fear of long term side effects and desire to stay drug-free whilst healthy.(27)  
29  
30  
31  
32  
33  
34

35 Considering ARTs was another point at which some participants anticipated 'biographical disruption'  
36 which deterred them from starting treatment.  
37  
38

39 The study's strengths are in the large number of participants at two different clinics, the inclusion of  
40 a range of people with HIV broadly similar to the cohorts seen at these clinics, and diagnosed across  
41 the four generations. The semi-structured interview format allowed us to explore factors important  
42 to participants rather than asking about pre-defined concerns. However, our study sample was  
43 imbalanced between generations, with larger numbers of women in the earliest two generation and  
44 only one of those more recently diagnosed. This means that some of our conclusions about  
45 generation may also reflect gendered differences. Our recruitment methods that relied on  
46 recruitment from the two clinics meant we were not able to explore the experiences of those who  
47 remain outside care. The study is also limited by the single interview format which meant people  
48 were having to recall past experiences, some of which were three decades ago. This may have  
49 introduced recall bias with subsequent experience colouring earlier reports; moreover, earlier  
50  
51  
52  
53  
54  
55  
56  
57

1  
2  
3 generations had more time to have disengaged and re-engaged with care. The focus of the study on  
4 a particular model of care in London limits the generalisability of our findings to other settings.

5  
6 The evolution of simpler treatments has been accompanied by a reconfiguration of the care  
7 pathway. In London, HIV clinics are increasingly narrowly focused on HIV and HIV-specific  
8 medications and clinicians are not authorised to provide more holistic medical care.(28) In practice,  
9 this has led to less frequent clinic visits, a shift to virtual “e-clinics”, and greater links with, and  
10 reliance on, general practitioners. The impact of this on the care continuum is unclear. Continuity of  
11 clinician, the atmosphere in the clinic and good communication are recognised to be key issues for  
12 patients. (29, 30)

13  
14 There is increasing recognition that viral suppression is not the final goal for people who are now  
15 living longer with HIV.(31-33) Lazarus et al (2016) have called for a ‘fourth 90’ “providing an explicit  
16 target for health- related quality of life”(31). In December2017 these concerns were embodied in  
17 policy recommendations from the European Parliament calling for an integrated and patient-centred  
18 approach to long term HIV care ensuring that services are meeting this challenge. (34) Our study  
19 illustrates that the patient journey is complex and personalised care should not be lost with  
20 streamlining pathways. All our participants were virally suppressed but that can hide the reality of  
21 their reliance on the caregivers to help maintain that stability.

22  
23 A personal, holistic approach has been a hallmark of HIV care since the beginning of the epidemic. It  
24 is important that major advances in biomedical treatment do not undermine the care continuum  
25 through a loss of care that meets the complex needs of patients, for whom HIV diagnosis and  
26 treatment remain significant challenges requiring supportive and flexible care.  
27  
28  
29  
30  
31  
32  
33  
34  
35  
36  
37  
38  
39  
40  
41  
42  
43  
44  
45  
46  
47  
48  
49  
50  
51  
52  
53  
54  
55  
56  
57

1  
2  
3  
4  
5 **Acknowledgements:** Thanks to participants for sharing their time and stories, to Jane Rowlands and  
6 Chris Higgs for conducting some of the interviews and the staff of both clinics for facilitating the  
7 study.  
8  
9

10 **Contributorship statement:** All four authors, J. Bruton, T. Rai, S. Day and H. Ward, were involved in  
11 the design of the study. J. Bruton and T. Rai completed the initial analysis and interpretation of the  
12 data and subsequent discussion and analysis was undertaken by all 4 authors through team  
13 discussion. J. Bruton completed the first draft of the manuscript. All four authors participated in  
14 critiquing and revising the draft manuscript and all approved the final draft.  
15  
16

17 All four authors accept accountability for the submitted paper.

18 T. Rai and J. Bruton only undertook the interviews alongside collaborators J. Rowlands and C.Higgs.  
19  
20

21 **Funders:** Funded by grants from Imperial NIHR Biomedical Research Centre, P35771, the Imperial  
22 College Healthcare Charity, P44223, and supported by the St Stephens AIDS Trust. No  
23 pharmaceutical grants were received in the development of this study.  
24  
25

26 **Competing Interests:** There are no competing interests  
27

28 **Data sharing statement:** The interview transcripts are anonymised and stored securely at Imperial  
29 College London on a password protected database on a password protected computer. The  
30 participants were assured of the security of their data and they would remain confidential.  
31  
32  
33  
34  
35

## 36 References

- 37 1. Gardner EM, McLees MP, Steiner JF, del Rio C, Burman WJ. The Spectrum of Engagement in  
38 HIV Care and its Relevance to Test-and-Treat Strategies for Prevention of HIV Infection. *Clinical  
39 Infectious Diseases*. 2011;52(6):793-800.
- 40 2. UNAIDS. UNAIDS. 90-90-90 - an ambitious treatment target to help end the AIDS epidemic  
41 (accessed June 21, 2017) <http://www.unaids.org/en/resources/documents/2014/90-90-90>. 2014.
- 42 3. Kirwan PD CC, Brown AE., Gill ON., Delpech VC. and contributors. HIV in the UK: 2016 Report.  
43 London: Public Health England; 2016.
- 44 4. Flowers P, Davis MM, Larkin M, Church S, Marriott C. Understanding the impact of HIV  
45 diagnosis amongst gay men in Scotland: an interpretative phenomenological analysis. *Psychology &  
46 health*. 2011;26(10):1378-91.
- 47 5. Christopoulos KA, Massey AD, Lopez AM, Geng EH, Johnson MO, Pilcher CD, et al. "Taking a  
48 half day at a time:" patient perspectives and the HIV engagement in care continuum. *AIDS patient  
49 care and STDs*. 2013;27(4):223-30.
- 50 6. Gale NK, Heath G, Cameron E, Rashid S, Redwood S. Using the framework method for the  
51 analysis of qualitative data in multi-disciplinary health research. *BMC Medical Research  
52 Methodology*. 2013;13(1):117.  
53  
54  
55  
56  
57

7. Deeks SG, Lewin SR, Havlir DV. The End of AIDS: HIV Infection as a Chronic Disease. *Lancet*. 2013;382(9903):1525-33.
8. Yehia BR, Gebo KA, Hicks PB, Korthuis PT, Moore RD, Ridore M, et al. Structures of Care in the Clinics of the HIV Research Network. *AIDS patient care and STDs*. 2008;22(12):1007-13.
9. Ogaz D. FM, Connor N., Gill ON. and contributors. HIV testing in England:2016 report. London England: Public Health England; 2016.
10. Rayment M, Thornton A, Mandalia S, Elam G, Atkins M, Jones R, et al. HIV Testing in Non-Traditional Settings – The HINTS Study: A Multi-Centre Observational Study of Feasibility and Acceptability. *PLOS ONE*. 2012;7(6):e39530.
11. Wise J. Guidelines call for HIV testing to be “normalised”. *BMJ*. 2008;337.
12. Roth NL, Nelson MS. HIV diagnosis rituals and identity narratives. *AIDS Care*. 1997;9(2):161-80.
13. Stevens PE, Hildebrandt E. Life changing words: women's responses to being diagnosed with HIV infection. *ANS Advances in nursing science*. 2006;29(3):207-21.
14. Stevens PE, Tighe Doerr B. Trauma of discovery: women's narratives of being informed they are HIV-infected. *AIDS Care*. 1997;9(5):523-38.
15. Anderson M, Elam G, Gerver S, Solarin I, Fenton K, Easterbrook P. "It took a piece of me": initial responses to a positive HIV diagnosis by Caribbean people in the UK. *AIDS Care*. 2010;22(12):1493-8.
16. Meursing K, Sibindi F. HIV counselling — a luxury or necessity? *Health Policy and Planning*. 2000;15(1):17-23.
17. Christopoulos KA, Massey AD, Lopez AM, Hare CB, Johnson MO, Pilcher CD, et al. Patient Perspectives on the Experience of Being Newly Diagnosed with HIV in the Emergency Department/Urgent Care Clinic of a Public Hospital. *PLOS ONE*. 2013;8(8):e74199.
18. Clifton S, Nardone A, Field N, Mercer CH, Tanton C, Macdowall W, et al. HIV testing, risk perception, and behaviour in the British population. *AIDS (London, England)*. 2016;30(6):943-52.
19. Bury M. Chronic illness as biographical disruption. *Sociology of health & illness*. 1982;4(2):167-82.
20. Worthington C, Myers T. Desired elements of HIV testing services: test recipient perspectives. *AIDS patient care and STDs*. 2002;16(11):537-48.
21. Hult JR, Maurer SA, Moskowitz JT. "I'm sorry, you're positive": a qualitative study of individual experiences of testing positive for HIV. *AIDS Care*. 2009;21(2):185-8.
22. Kempf MC, McLeod J, Boehme AK, Walcott MW, Wright L, Seal P, et al. A qualitative study of the barriers and facilitators to retention-in-care among HIV-positive women in the rural southeastern United States: implications for targeted interventions. *AIDS patient care and STDs*. 2010;24(8):515-20.
23. Yehia BR, Stewart L, Momplaisir F, Mody A, Holtzman CW, Jacobs LM, et al. Barriers and facilitators to patient retention in HIV care. *BMC Infectious Diseases*. 2015;15(1):246.
24. Engelhard EA, Smit C, Van Sighem A, Reiss P, Nieuwkerk PT, Kroon FP, et al. Impact of HIV care facility characteristics on the cascade of care in HIV-infected patients in the Netherlands. *AIDS (London, England)*. 2016;30(2):301-10.
25. Newman CE. Appreciating doubts about HIV medicine2015.
26. BHIVA. British HIV Association guidelines for the treatment of HIV-1- positive adults with antiretroviral therapy. 2015 (2016 interim update) 2016.
27. Persson A, Newman CE, Mao L, de Wit J. On the Margins of Pharmaceutical Citizenship: Not Taking HIV Medication in the "Treatment Revolution" Era. *Medical anthropology quarterly*. 2016;30(3):359-77.
28. Miller R. GJ. Commissioning London's HIV Services. *Civitas (Institute for the Study of Civil Society)*; 2011.
29. Weatherburn P. KP, Reid D., Hammond G., Jessup K. My care I care: A study of what people with HIV value about NHS HIV Services across London. *Sigma Research*; 2013.

- 1  
2  
3 30. Haggerty JL, Reid RJ, Freeman GK, Starfield BH, Adair CE, McKendry R. Continuity of care: a  
4 multidisciplinary review. *BMJ: British Medical Journal*. 2003;327(7425):1219.
- 5 31. Lazarus JV, Safreed-Harmon K, Barton SE, Costagliola D, Dedes N, del Amo Valero J, et al.  
6 Beyond viral suppression of HIV – the new quality of life frontier. *BMC Medicine*. 2016;14(1):94.
- 7 32. Highlights from the BHIVA Satellite Symposium, IAS Conference, Paris, France, July 2017:  
8 ‘Tougher times: adapting to increasing demand with declining resources’. *Journal of Virus*  
9 *Eradication*. 2017;3(4):250-2.
- 10 33. Martel K CJ, Auberbach J. Looking Beyond Viral Suppression: Findings from The Well  
11 Project's User Survey on Factors Influeincing the Health, Well-being, and Quality of Life of Women  
12 Living with HIV [IAS 2017 Poster]. 2017 [Available from: <http://www.thewellproject.org/news-press/looking-beyond-viral-suppression-findings-well-project%E2%80%99s-2016-user-survey-factors>].
- 13  
14  
15 34. HIV Outcomes, Beyond Viral Suppression. Recommendations Launched at the European  
16 Parliament. 2017 [cited 03/01/2018]. [cited 03/01/2018]. Available from:  
17 [http://hivoutcomes.eu/wp-content/uploads/2017/11/HIV\\_Booklet\\_FINAL-DIGITAL-version.pdf](http://hivoutcomes.eu/wp-content/uploads/2017/11/HIV_Booklet_FINAL-DIGITAL-version.pdf).
- 18  
19  
20  
21  
22  
23  
24  
25  
26  
27  
28  
29  
30  
31  
32  
33  
34  
35  
36  
37  
38  
39  
40  
41  
42  
43  
44  
45  
46  
47  
48  
49  
50  
51  
52  
53  
54  
55  
56  
57

#### Key statements

- A qualitative study understanding the patients' perspective of their experience of the HIV care continuum
- The diverse study cohort spans 4 'generations' diagnosed at different time points between 1986 and 2014 reflecting the evolution of ARTs
- There are striking similarities of experience and significance at key points on the continuum: diagnosis, engaging in care and starting treatment
- Despite advances of biomedical treatment clinical services should continue to recognise the needs of patients for whom HIV diagnosis and treatment remains a significant challenge

peer review only

## COREQ (CONsolidated criteria for REporting Qualitative research) Checklist

A checklist of items that should be included in reports of qualitative research. You must report the page number in your manuscript where you consider each of the items listed in this checklist. If you have not included this information, either revise your manuscript accordingly before submitting or note N/A.

| Topic                                          | Item No. | Guide Questions/Description                                                                                                                              | Reported on Page No. |
|------------------------------------------------|----------|----------------------------------------------------------------------------------------------------------------------------------------------------------|----------------------|
| <b>Domain 1: Research team and reflexivity</b> |          |                                                                                                                                                          |                      |
| <i>Personal characteristics</i>                |          |                                                                                                                                                          |                      |
| Interviewer/facilitator                        | 1        | Which author/s conducted the interview or focus group?                                                                                                   |                      |
| Credentials                                    | 2        | What were the researcher's credentials? E.g. PhD, MD                                                                                                     |                      |
| Occupation                                     | 3        | What was their occupation at the time of the study?                                                                                                      |                      |
| Gender                                         | 4        | Was the researcher male or female?                                                                                                                       |                      |
| Experience and training                        | 5        | What experience or training did the researcher have?                                                                                                     |                      |
| <i>Relationship with participants</i>          |          |                                                                                                                                                          |                      |
| Relationship established                       | 6        | Was a relationship established prior to study commencement?                                                                                              |                      |
| Participant knowledge of the interviewer       | 7        | What did the participants know about the researcher? e.g. personal goals, reasons for doing the research                                                 |                      |
| Interviewer characteristics                    | 8        | What characteristics were reported about the interviewer/facilitator? e.g. Bias, assumptions, reasons and interests in the research topic                |                      |
| <b>Domain 2: Study design</b>                  |          |                                                                                                                                                          |                      |
| <i>Theoretical framework</i>                   |          |                                                                                                                                                          |                      |
| Methodological orientation and Theory          | 9        | What methodological orientation was stated to underpin the study? e.g. grounded theory, discourse analysis, ethnography, phenomenology, content analysis |                      |
| <i>Participant selection</i>                   |          |                                                                                                                                                          |                      |
| Sampling                                       | 10       | How were participants selected? e.g. purposive, convenience, consecutive, snowball                                                                       |                      |
| Method of approach                             | 11       | How were participants approached? e.g. face-to-face, telephone, mail, email                                                                              |                      |
| Sample size                                    | 12       | How many participants were in the study?                                                                                                                 |                      |
| Non-participation                              | 13       | How many people refused to participate or dropped out? Reasons?                                                                                          |                      |
| <i>Setting</i>                                 |          |                                                                                                                                                          |                      |
| Setting of data collection                     | 14       | Where was the data collected? e.g. home, clinic, workplace                                                                                               |                      |
| Presence of non-participants                   | 15       | Was anyone else present besides the participants and researchers?                                                                                        |                      |
| Description of sample                          | 16       | What are the important characteristics of the sample? e.g. demographic data, date                                                                        |                      |
| <i>Data collection</i>                         |          |                                                                                                                                                          |                      |
| Interview guide                                | 17       | Were questions, prompts, guides provided by the authors? Was it pilot tested?                                                                            |                      |
| Repeat interviews                              | 18       | Were repeat interviews carried out? If yes, how many?                                                                                                    |                      |
| Audio/visual recording                         | 19       | Did the research use audio or visual recording to collect the data?                                                                                      |                      |
| Field notes                                    | 20       | Were field notes made during and/or after the interview or focus group?                                                                                  |                      |
| Duration                                       | 21       | What was the duration of the interviews or focus group?                                                                                                  |                      |
| Data saturation                                | 22       | Was data saturation discussed?                                                                                                                           |                      |
| Transcripts returned                           | 23       | Were transcripts returned to participants for comment and/or                                                                                             |                      |



| Topic                                  | Item No. | Guide Questions/Description                                                                                                        | Reported on Page No. |
|----------------------------------------|----------|------------------------------------------------------------------------------------------------------------------------------------|----------------------|
|                                        |          | correction?                                                                                                                        |                      |
| <b>Domain 3: analysis and findings</b> |          |                                                                                                                                    |                      |
| <i>Data analysis</i>                   |          |                                                                                                                                    |                      |
| Number of data coders                  | 24       | How many data coders coded the data?                                                                                               |                      |
| Description of the coding tree         | 25       | Did authors provide a description of the coding tree?                                                                              |                      |
| Derivation of themes                   | 26       | Were themes identified in advance or derived from the data?                                                                        |                      |
| Software                               | 27       | What software, if applicable, was used to manage the data?                                                                         |                      |
| Participant checking                   | 28       | Did participants provide feedback on the findings?                                                                                 |                      |
| <i>Reporting</i>                       |          |                                                                                                                                    |                      |
| Quotations presented                   | 29       | Were participant quotations presented to illustrate the themes/findings?<br>Was each quotation identified? e.g. participant number |                      |
| Data and findings consistent           | 30       | Was there consistency between the data presented and the findings?                                                                 |                      |
| Clarity of major themes                | 31       | Were major themes clearly presented in the findings?                                                                               |                      |
| Clarity of minor themes                | 32       | Is there a description of diverse cases or discussion of minor themes?                                                             |                      |

Developed from: Tong A, Sainsbury P, Craig J. Consolidated criteria for reporting qualitative research (COREQ): a 32-item checklist for interviews and focus groups. *International Journal for Quality in Health Care*. 2007. Volume 19, Number 6: pp. 349 – 357

**Once you have completed this checklist, please save a copy and upload it as part of your submission. DO NOT include this checklist as part of the main manuscript document. It must be uploaded as a separate file.**

# BMJ Open

## Patient perspectives on the HIV continuum of care in London: a qualitative study of people diagnosed between 1986 and 2014

|                                 |                                                                                                                                                                                                                                                                                                                                                                                                         |
|---------------------------------|---------------------------------------------------------------------------------------------------------------------------------------------------------------------------------------------------------------------------------------------------------------------------------------------------------------------------------------------------------------------------------------------------------|
| Journal:                        | <i>BMJ Open</i>                                                                                                                                                                                                                                                                                                                                                                                         |
| Manuscript ID                   | bmjopen-2017-020208.R3                                                                                                                                                                                                                                                                                                                                                                                  |
| Article Type:                   | Research                                                                                                                                                                                                                                                                                                                                                                                                |
| Date Submitted by the Author:   | 01-Mar-2018                                                                                                                                                                                                                                                                                                                                                                                             |
| Complete List of Authors:       | Bruton, Jane; Imperial College London, Department of Infectious Disease Epidemiology<br>Rai, Tanvi; Imperial College London, Department of Infectious Disease Epidemiology<br>Day, Sophie; Imperial College London, Department of Infectious Disease Epidemiology; Goldsmiths University of London, Anthropology<br>Ward, Helen; Imperial College London, Department of Infectious Disease Epidemiology |
| <b>Primary Subject Heading</b>: | HIV/AIDS                                                                                                                                                                                                                                                                                                                                                                                                |
| Secondary Subject Heading:      | Qualitative research, Health services research, Patient-centred medicine                                                                                                                                                                                                                                                                                                                                |
| Keywords:                       | HIV & AIDS < INFECTIOUS DISEASES, QUALITATIVE RESEARCH, PATIENT EXPERIENCE, HIV CARE CONTINUUM                                                                                                                                                                                                                                                                                                          |
|                                 |                                                                                                                                                                                                                                                                                                                                                                                                         |

SCHOLARONE™  
Manuscripts

only

1  
2  
3  
4  
5 **Patient perspectives on the HIV continuum of care in London: a**  
6 **qualitative study of people diagnosed between 1986 and 2014**  
7  
8  
9

10  
11 Jane Bruton RN, BA, MA Medical Anthropology; Tanvi Rai PhD Public Health, MPH, BA, BSc; Sophie  
12 Day, PhD, BA, MA Anthropology; BSc Helen Ward PhD, FRCP, FFPH, MBChB, MSc Epidemiology.  
13

14  
15 Corresponding author:  
16 Pamela Jane Bruton,  
17 Department of Infectious Disease Epidemiology,  
18 School of Public Health,  
19 Imperial College,  
20 St Mary's Campus,  
21 Norfolk Place,  
22 London.  
23 W2 1PG  
24 [jbruton@ic.ac.uk](mailto:jbruton@ic.ac.uk)  
25 0207 5943464  
26

27  
28 Co-authors:  
29 Rai, Tanvi: Imperial College London, Department of Infectious Disease Epidemiology.  
30 Day, Sophie: Imperial College London, Department of Infectious Disease Epidemiology and  
31 Goldsmiths College  
32 Ward, Helen: Imperial College London, Department of Infectious Disease Epidemiology.  
33  
34

35 Word count: Main text 4051  
36  
37  
38  
39  
40  
41  
42  
43  
44  
45  
46  
47  
48  
49  
50  
51  
52  
53  
54  
55  
56  
57

## Abstract

**Objectives:** To describe the experiences of the HIV treatment cascade of diagnosis, engagement with care and initiation of treatment, from the perspective of patients; we explored whether this differed according to the year of their diagnosis, for example whether they had experienced HIV care in the pre-treatment era.

**Design:** Qualitative interview study with framework analysis

**Setting:** Two large HIV adult outpatient clinics in central London.

**Participants:** 52 HIV positive individuals, 41 men, 11 women, purposively sampled to include people who had been diagnosed at different stages in the history of the epidemic classified as four 'generations': pre-1996 (pre-ART), 1997 to 2005 (complex ARTs), 2006 to 2012 (simpler ARTs), 2013 onwards (recent diagnoses).

**Results:** Some important differences were identified; for earlier generations, the visible illness and deaths from AIDS made it harder to engage with care following diagnosis. Subsequent decisions about starting treatment were deeply influenced by the fear of severe side-effects from early antiretroviral therapy (ART). However, despite improvements in ART and life expectancy over the epidemic we found a striking similarity across participants' accounts of the key stages of the care continuum, regardless of when they were diagnosed. Diagnosis was a major traumatic life event for almost everyone, fear of testing positive or having low self-perceived risk affected the timing of testing and diagnosis, engaging with care was facilitated by a flexible approach from services/clinicians and initiating treatment was a major life decision.

**Conclusion:** We found patients' experiences are influenced by when they were diagnosed, with earliest cohorts facing substantial challenges. However, being diagnosed with HIV and starting treatment continue to be significant life-altering events even in the era of effective, simple treatments. Despite the advances of biomedical treatment services should continue to recognise the needs of patients for whom the diagnosis and treatment remain significant challenges.

1  
2  
3 Strengths  
4

- 5 • The large number of participants, at two different clinics and the inclusion of a range of  
6 people with HIV, broadly similar to the clinic cohorts, across four HIV 'generations'.
- 7  
8 • The interview format allowed us to explore factors important to participants rather than  
9 asking about pre-defined concerns.  
10

11 Limitations  
12

- 13 • An imbalance between generations, with larger numbers of women in the earliest two  
14 generations and only one woman in the generation recently diagnosed. This means that  
15 some of our conclusions about generations may also reflect gendered differences.  
16
- 17 • Our recruitment methods meant we were not able to explore the experiences of those who  
18 remain outside care.  
19
- 20 • Limitation of the single interview format means people were having to recall past  
21 experiences, some of which were three decades ago. This may have introduced recall bias  
22 with subsequent experience colouring earlier reports.  
23  
24  
25  
26  
27  
28  
29  
30  
31  
32  
33  
34  
35  
36  
37  
38  
39  
40  
41  
42  
43  
44  
45  
46  
47  
48  
49  
50  
51  
52  
53  
54  
55  
56  
57

## INTRODUCTION

The Human Immunodeficiency Virus (HIV) continuum of care provides stepwise estimates for the stages of engagement in care for people living with HIV (PLHIV).(1) The Joint United Nations Programme on HIV and AIDS (UNAIDS) goal to end the Acquired Immune Deficiency Syndrome (AIDS) epidemic by 2020 stipulates a target of 90% of all people with HIV be diagnosed, of whom 90% are on antiretroviral therapy (ART), of whom 90% (73% of PLHIV) are virally suppressed.(2) The United Kingdom (UK) has one of the best outcomes for HIV treatment and care in the world with an estimated 78% of PLHIV having an undetectable viral load.(3, 4) However the statistics do not and cannot tell us about the patient experience of passing through these stages of care whether it be good or bad. The continuum essentially measures the success of programmes from a provider rather than a patient perspective.(5)

Flowers argues that there is a tension between the certainty and confidence of a linear HIV pathway, associated with ideas of clinical efficacy, and patient experiences of diagnosis and prognosis, which can be full of uncertainty.(4) With the evolution of modern ARTs we have witnessed the transformation of HIV from an acute life-threatening infection to a treatable chronic condition and a concurrent evolving of the care continuum. However, it is unclear whether this change is reflected in patients' own experiences of passing through each of the stages of care. For example, has the moment of diagnosis become any less traumatic, and have decisions about starting treatment become simpler for patients? Analysis of patient narratives, historically and currently, may help to highlight significant factors for patients in the care continuum. This is particularly important in a climate of National Health Service (NHS) restructuring in the UK, which has led to reductions in non-clinical services and streamlining of care. To this end we explored the patient perspectives on the care continuum. And we hypothesized that patients' experiences of, and engagement with, care would differ according to what point in the epidemic they were diagnosed.

## METHODS

We undertook a qualitative study of people attending two public HIV clinics in London that have provided care since the start of the epidemic; they were also chosen for their large size and diversity, in terms of demographics. They are both specialist HIV clinics linked to sexual health (genitourinary medicine) services. Care is provided by physician-led multidisciplinary teams where patients have a named consultant. HIV care in the UK is free and open access, allowing patients to register at their clinic of choice. We used a purposive sampling method to recruit patients with a range of experiences. To reflect the evolution of ART, we identified four 'generations' according to time of diagnosis: pre-1996 (pre-ART), 1997 to 2005 (complex ARTs), 2006 to 2012 (simpler ARTs), 2013

onwards (recent diagnoses). Within each generation, we aimed to include people with a range of characteristics, including, gender, exposure, age and ethnicity. Participants were recruited opportunistically by researchers attending clinical services, and through fliers and digital advertising in clinical areas. Recruitment was periodically checked against the recruitment matrix and under-represented groups/strata targeted.

Patients were provided with information and gave written consent. Interviews took place in private rooms in or near the clinics or at the patient's home; they were recorded and transcribed, and lasted between 60 and 90 minutes. The interviews were semi-structured and carried out by one male (CH) and three female researchers (JB, TR, JR), three of whom had clinical backgrounds. The interviews were based on a topic guide (see supplementary file) informed by a focus group of PLHIV who assisted in designing the research. We invited participants to recall their initial diagnosis and describe key points in their HIV journey including testing, disclosure, support, engaging with care, starting treatment, medication adherence, work and social life. Field notes were written after the interviews.

Transcripts were uploaded to NVivo, a qualitative data analysis software package. Using Framework analysis, we developed key themes through a systematic process which involved reading, rereading, coding and summarising the transcripts; and subsequent in-depth analysis of the dataset.<sup>(6)</sup> Final themes were discussed in the research group (HW, JB, SD, TR) and further analysed in relation to the existing literature.

Ethical approval was obtained from the National Research Ethics Service (NRES) (reference number 14/WM/0147) in May 2014, and research governance approval obtained from the local sites.

## RESULTS

Fifty-two patients were recruited, 25 at one clinic and 27 at the other. The sample included 41 men and 11 women; 37 men acquired HIV through sex with other men (MSM), the rest through heterosexual contact (n=14) or injection drug use (n=1). There were 11 in generation 1, 14 generation 2, 17 generation 3 and 10 generation 4. The characteristics of the study participants alongside those of the clinic population for 2014 are shown in Table 1.

**Table 1. Study sample characteristics compared with the clinic cohorts**

|               | Clinic A     |       |             |       | Clinic B     |       |             |       |
|---------------|--------------|-------|-------------|-------|--------------|-------|-------------|-------|
|               | Study sample |       | 2014 Cohort |       | Study sample |       | 2014 Cohort |       |
| <b>Gender</b> |              |       |             |       |              |       |             |       |
| Male          | 18           | 72.0% | 2459        | 77.5% | 23           | 85.2% | 7743        | 90.3% |
| Female        | 7            | 28.0% | 715         | 22.5% | 4            | 14.8% | 830         | 9.7%  |

|                          |    |       |             |       |    |       |             |       |  |
|--------------------------|----|-------|-------------|-------|----|-------|-------------|-------|--|
| <b>Age</b>               |    |       |             |       |    |       |             |       |  |
| 18-24                    | 0  | 0.0%  | 124         | 3.9%  | 0  | 0.0%  | 186         | 2.2%  |  |
| 25-34                    | 4  | 16.0% | 465         | 14.7% | 3  | 11.1% | 1729        | 20.2% |  |
| 35-49                    | 16 | 64.0% | 1502        | 47.3% | 14 | 51.9% | 4164        | 48.6% |  |
| 50+                      | 5  | 20.0% | 1083        | 34.1% | 10 | 37.0% | 2494        | 29.1% |  |
| <b>Ethnicity</b>         |    |       |             |       |    |       |             |       |  |
| White                    | 14 | 56.0% | 1541        | 48.6% | 22 | 81.5% | 6401        | 74.7% |  |
| Black African            | 5  | 20.0% | 720         | 22.7% | 5  | 18.5% | 778         | 9.1%  |  |
| Black Caribbean          | 0  | 0.0%  | 114         | 3.6%  | 0  | 0.0%  | 201         | 2.3%  |  |
| Other/Mixed              | 6  | 24.0% | 746         | 23.5% | 0  | 0.0%  | 1132        | 13.2% |  |
| Not reported             | 0  | 0.0%  | 53          | 1.7%  | 0  | 0.0%  | 61          | 0.7%  |  |
| <b>Exposure route</b>    |    |       |             |       |    |       |             |       |  |
| Sex between men          | 15 | 60.0% | 1971        | 62.1% | 22 | 81.5% | 6776        | 79.0% |  |
| Heterosexual contact     | 9  | 36.0% | 1037        | 32.7% | 5  | 18.5% | 1209        | 14.1% |  |
| Injecting drug use       | 1  | 4.0%  | 52          | 1.6%  | 0  | 0.0%  | 109         | 1.3%  |  |
| Other                    | 0  | 0.0%  | 112         | 3.5%  | 0  | 0.0%  | 46          | 0.5%  |  |
| Undetermined             | 0  | 0.0%  | 2           | 0.1%  | 0  | 0.0%  | 433         | 5.1%  |  |
| <b>Year of diagnosis</b> |    |       |             |       |    |       |             |       |  |
| Pre-1997                 | 6  | 24.0% | 638         | 20.1% | 5  | 18.5% | 1399        | 16.3% |  |
| 1997-2005                | 6  | 24.0% | 1234        | 38.9% | 8  | 29.6% | 2580        | 30.1% |  |
| 2006-2012                | 7  | 28.0% | 986         | 31.1% | 10 | 37.0% | 3199        | 37.3% |  |
| 2013 onwards             | 6  | 24.0% | 316         | 10.0% | 4  | 14.8% | 1395        | 16.3% |  |
| <b>Total</b>             |    |       | <b>3174</b> |       |    |       | <b>8573</b> |       |  |

The generation samples differed somewhat by gender and acquisition: the women were concentrated in generations 1 and 2 (n=6 and 4, respectively), and MSM in generations 3 and 4 (n=16 and 8, respectively).

We have used pseudonyms for each of the following quotes from participants.

#### **“Becoming positive” – the impact of HIV diagnosis**

The experience of receiving an HIV diagnosis was similar across the generations. First reactions were generally of shock and fear of death, irrespective of generation. Alan, diagnosed in 1991, knew nothing about HIV and had not tested before. He remembers vividly the time he received his result:



1  
2  
3 *"I could hear myself saying 'I'm going to die'. Not verbally but in my mind, 'I'm going to die,*  
4 *I'm going to die'" (gen1, MSM)*

5  
6  
7 Sylvia, diagnosed 2001, was "totally devastated":

8  
9 *"... I didn't see myself going back and doing my Master's degree for what reason am I going*  
10 *back to do that if I have maybe five years to live" (gen 2, woman)*

11  
12 Roger, diagnosed more than 20 years later, reported several previous tests and considered himself  
13 well-informed. However, his principal concern on receiving a positive diagnosis was also about life  
14 expectancy:  
15

16  
17 *"But even I was not certain. Certainty is the wrong word. I was under the illusion that my*  
18 *expiry date was stamped on me now" (gen4, MSM)*

19  
20  
21 Fear of a positive result was a key factor in delayed diagnosis for several MSM in all generations,  
22 who reported concerns about the impact of HIV on their lives. They were aware of their risk, and  
23 described feeling relieved at diagnosis as HIV had been "*hanging over them*" for years; the diagnosis  
24 confirmed their suspicions. William, who had never tested before, presented with symptoms:  
25

26  
27  
28 *"[I had been] burying my head in the sand. I guess I knew I had it but didn't, at the same*  
29 *time, want it confirmed" (gen2, MSM)*

30  
31  
32 Brian (Gen4, MSM), recently diagnosed, had "*spent on and off probably eight years thinking about*  
33 *it*" He felt he had "*done all the thinking before*" ... so although disappointed, he was also relieved.

34  
35  
36 Most other participants, particularly heterosexual men and women, were not expecting a positive  
37 result and had not requested an HIV test. They were diagnosed either following ongoing symptoms  
38 of ill health or having presented for a general sexual health check-up.  
39

40  
41 None of the women had been diagnosed during pregnancy; most were diagnosed before ante-natal  
42 screening became routine in the UK (1999). For example, Olivia, diagnosed in 1998, had not been  
43 tested in pregnancy. Her six-month old baby became sick, and both baby and husband were then  
44 diagnosed with HIV but she did not believe she had HIV and delayed testing for several weeks

45  
46 *"Me I don't have HIV because I never went with other men" (gen2, woman)*

47  
48 The response and level of support offered by clinicians at this critical time were important to  
49 participants' immediate wellbeing and influenced what happened next, including continuing  
50 engagement in care. Martha remarked:  
51

52  
53 *"I remember how lovely [name of clinician] was and I've always said I could never wish for a*  
54 *better person to ever tell me or try to guide me, or to reassure me more than what she did*  
55 *because she was perfect" (Gen4, woman)*

1  
2  
3 While most experiences were positive, there were some exceptions. Paul (gen3, MSM) had regularly  
4 tested negative but continued to take risks. Testing positive in 2010 was totally unexpected, leaving  
5 him *“numb with shock”*, and he did not feel that he was supported appropriately. The clinician who  
6 gave him the diagnosis seemed *“[to be on] autopilot because he had seen people like me before”* and  
7 was *“working to his own agenda”*. Despite Paul’s obvious distress, the clinician asked him to ring  
8 potential contacts during the consultation. Further, when the clinician said: *“Oh this can be  
9 managed, don’t worry”*, Paul interpreted this to mean ‘managed to his death’. After two weeks of  
10 acute anxiety, Paul contacted a friend who was able to reassure him about treatment and the care  
11 pathway. Similar experiences led other participants to feel vulnerable, isolated and slow to accept  
12 their diagnosis.  
13  
14  
15  
16  
17  
18  
19  
20

### 21 **“Becoming an HIV patient”: Developing a relationship with clinic and clinician**

22  
23 Once diagnosed, participants described a sense of reassurance about being in the “best hands”,  
24 managed by experts in HIV medicine. The majority across the generations described strong  
25 relationships with their clinicians and valued seeing the same person each visit. It felt *“like a  
26 partnership”* with *“someone you can tell anything”*, who knew them and their entire history,  
27 ensuring that care went beyond just the clinical management of HIV: *“We seriously talk about how I  
28 am not just what my CD4 count is”*.  
29  
30  
31  
32

33 However, some had not developed a trusting relationship. Marty (gen3, MSM), for example,  
34 diagnosed HIV in 2012, was not eligible for treatment under guidelines at that point. He described  
35 anxiety about this lack of treatment, feeling that it adversely affected pre-existing mental health  
36 problems which were not addressed by his clinicians. He attended two different clinics and was on  
37 the verge of dropping out of care when, as he recounted: *“I basically rescued myself”*. His friend  
38 recommended a clinician: *“She got me just like that thank god, thank god...I finally found and she  
39 was willing to fight my case”*.  
40  
41  
42  
43

44 Another participant, Peter, diagnosed 2009, reported changing HIV clinics within three months of  
45 diagnosis. He recalled a series of mistakes, miscommunication and a “dehumanising” clinic  
46 environment. Losing trust in clinicians and the service, he finally gained confidence from attending a  
47 support group and moved his care:  
48  
49  
50

51 *“I remember that I said, it was like falling off a building... I’m slowly falling backwards as the  
52 virus increases. It felt like they were holding a blanket at the bottom to catch me but it felt  
53 like they were holding it in the wrong place. I was being asked to trust”* (gen3, MSM)  
54  
55  
56  
57

1  
2  
3 All participants valued continuity of care although two recently diagnosed felt that it was not always  
4 necessary to see the same clinician. But, continuity was affected by what some described as the very  
5 busy clinics limiting the time for consultations and impeding communication.  
6  
7

8 All participants were in care at the time of the interview but some described having stayed away in  
9 the past. Two of six women diagnosed before 1996 had dropped out of care for several years. Given  
10 the lack of effective treatment, they had found clinic visits depressing and preferred to keep away  
11 until they became sick. Marie (gen1, woman) explained, *"I didn't want a life where I just would go to*  
12 *tests and I am scared and they had nothing to offer"*. Alison (gen1, woman) described the *"terrible*  
13 *situation"* at the clinic, where she saw young gay men, couples, where one would be fit and the  
14 other *"in a wheelchair, a skeleton"*. She felt sorry for the doctors - *"there were all these poor young*  
15 *doctors with nothing to offer and seeing these very ill people."*  
16  
17  
18  
19  
20

21 Seven of all those diagnosed since ARTs became available described occasional or multiple lapses in  
22 attendance; these were generally explained by issues external to the clinic such as recreational drug  
23 use, household disruption, mental health problems or competing co-morbidities. Re-engagement  
24 with care was easier when their clinician actively reached out; for example, some consultants had  
25 telephoned patients when they missed appointments and one woman (gen1) described  
26 interventions of this kind as being *"like my family"*. Even though not all patients were contacted  
27 when they did not attend services, and one expressed surprise that no-one had tried, all found their  
28 way back into care.  
29  
30  
31  
32  
33  
34  
35

### 36 **"Becoming medicalised": Starting treatment**

37

38 Almost all (48) of the participants were on treatment; one had stopped medication because of drug  
39 interactions and three chose to remain off treatment. Despite the simplification of regimens,  
40 participants in all four generations found the decision to start treatment a significant life event.  
41  
42

43 For earlier generations, the decision had been complex because of toxicity related to ARTs. Some  
44 refused treatment contrary to medical advice. Alison, described earlier, recalled, *"In the waiting*  
45 *rooms people said, 'don't take it, it will kill you', so I refused that (AZT)"*. Others felt well without  
46 treatment like Marie who was diagnosed in 1986 but only started ARTs 25 years after diagnosis  
47 when her CD4 count crashed. She felt she had no choice, *"I fought it all this time on my own, and*  
48 *then finally I had to give in and take a pill. That was kind of depressing"*.  
49  
50  
51  
52  
53  
54  
55  
56  
57

1  
2  
3 Those diagnosed more recently found it easier to decide to begin treatment, but it was still a  
4 significant moment. Tim, diagnosed in 2012, was aware of the latest research and asked to start  
5 treatment immediately, even for him, the ‘treatment appointment’ was a sobering experience:  
6  
7

8 *“[It was] the only time there was a tear. I just thought, God this is a new chapter now. This is*  
9 *a new chapter in my life. I am going to have to take this pill for the rest of my life”.* (, gen 3  
10 MSM)  
11

12  
13 Brian, diagnosed in 2013, sums up some of the issues that participants said they had considered  
14 when deciding to start medication:  
15

16  
17 *“Well the impact it would have on my life, the damage it would do to my body. Would I cope*  
18 *with the medication? Would I be able to continue working? Because so many people have*  
19 *side effects initially and it takes them a long time to get over. I had a lot of responsibility at*  
20 *work and I couldn’t actually manage responsibility well enough once on medication. Would I*  
21 *be able to take the medication on time? Would life’s pressures allow me to do what I needed*  
22 *to do? And so on”* (gen 4, MSM)  
23  
24  
25  
26

27 The three participants not on treatment described feeling healthy and wished to remain drug free  
28 for as long as possible.  
29

30  
31 For many participants, HIV occupied only a small part of their lives but daily medications proved to  
32 be a constant reminder of their status even if only for a moment each day. Martin, diagnosed in  
33 2014, described his relationship with his medication:  
34  
35

36 *“It’s strange sometimes because you look at this pill and you think between you and this little*  
37 *pill lies – it’s keeping you alive. And I have never had a pill to take like that before. So, it’s*  
38 *very strange. It’s my friend and foe at the same time”* (gen 4, MSM)  
39  
40  
41  
42  
43

## 44 DISCUSSION

45 We have found that patients’ experiences of, and engagement with, care are influenced by the point  
46 at which they were diagnosed, with the earliest cohorts facing substantial challenges. However, we  
47 have also found that being diagnosed with HIV and starting treatment continue to be significant life-  
48 altering events even in the era of effective and simple treatments. This study brings new insights  
49 which are important when considering how future services should be provided.  
50  
51

52  
53 The revolution in HIV treatment over three decades means it can now be described as a chronic,  
54 manageable condition.(7, 8) In our study, all our patients were virally suppressed having passed  
55  
56  
57

1  
2  
3 through all the stages of the continuum and arrived on the other side. However, patients' recall of  
4 their experience of navigating this journey revealed a range of quite complex issues faced by them at  
5 different points, reminding us that many challenges remain in the successful provision of HIV care.  
6 We hypothesized that the revolution in treatment would have an impact on the experience of the  
7 different diagnostic generations moving through the care continuum, with those diagnosed more  
8 recently having a smoother journey. We identified some important differences; the visible illness  
9 and deaths from AIDS made it harder for earlier generations to engage with or remain in care and  
10 some dropped out, returning only when ill. Decisions about treatment were particularly difficult for  
11 the early generations, for whom the association of treatment with severe side effects remained  
12 strong until more recently and who expressed pride in, and determination to, remaining well  
13 without treatment.  
14  
15  
16  
17  
18  
19

20  
21 However, our primary finding was a striking similarity across participants' accounts of key stages of  
22 the HIV care continuum: diagnosis was a major, traumatic life event for almost everyone, and  
23 anticipation of an HIV-positive status affected the timing of testing and diagnosis. Engagement with  
24 care was facilitated by a responsive, flexible approach on the part of services and clinicians, starting  
25 with the way the positive diagnosis was handled. Finally, initiating treatment was a major life  
26 decision even when recommended by protocol and considered straightforward by clinicians.  
27  
28  
29  
30

31 Despite the drive to normalise HIV testing through simplified sampling, reduced pre-test discussion  
32 and expanded test settings,(9, 10) (11) receiving an HIV diagnosis remained a significant shock for  
33 most participants irrespective of generation, sexuality or gender, as suggested elsewhere.(12-15)  
34 Moreover, we found that none of the heterosexual participants were expecting a positive result, a  
35 finding which also applied to some of the MSM participants. Resonating with other studies.(13, 16,  
36 17) , we found that fear of imminent death and experience of profound distress did not change,  
37 despite the availability of effective and less toxic treatments. This fear, often coupled with a fear of  
38 social exclusion and rejection, led some MSM participants who suspected they were positive to  
39 delay testing.(18) Bury (1982) usefully describes this experience of illness and especially chronic  
40 illness as "biographical disruption". When everyday life and its meanings are turned upside down,  
41 relationships and social networks are disrupted and plans for the future have to be re-examined.  
42 (19) Participants described this type of disruption at diagnosis, whether HIV was considered an acute  
43 infection or a chronic condition.  
44  
45  
46  
47  
48  
49  
50

51  
52 A clinician's approach to a patient with a positive result is considered critical to patients' experiences  
53 and may be more important than other aspects of the testing process.(12, 15, 17, 20, 21) We found  
54 that negative experiences at this critical point affected immediate well-being and further contact  
55  
56  
57

1  
2  
3 with services. The impact of those initial encounters, both good and bad, left participants with  
4 lasting impressions throughout their journey, thus demonstrating the importance of establishing  
5 trust between clinician and patient as a firm foundation for good retention in care.(22-24) Women, a  
6 minority in the clinics and, in our sample mainly from the earlier generations, faced particular  
7 challenges in engaging in care. This made the establishment of a trusting relationship with their  
8 clinician all the more important to managing their quality of life with HIV. Moreover, the importance  
9 of that relationship for participants was underlined by their willingness to change their treatment  
10 centre until they found what they perceived as a good clinician/patient relationship. The UK policy of  
11 open access to any clinic through self-referral may be another explanation for high levels of  
12 retention in care.  
13  
14  
15  
16  
17  
18

19 The prospect of treatment for life, to sustain life, was a major life event. Currently the moves  
20 towards starting treatment at diagnosis, the test-and-treat model, is based on the confidence of  
21 biomedicine in HIV management, but may be at odds with patient concerns.(25) British HIV  
22 Association (BHIVA) interim guidelines 2016 recommend starting treatment on all diagnosed with  
23 HIV regardless of CD4 count and continue to recognise that social, psychological, cultural, and  
24 economic factors can adversely affect adherence and treatment outcomes.(26) Starting medication  
25 on the same day as, or soon after, diagnosis when individuals may be distressed by the positive  
26 result could preclude a meaningful discussion of the patient's 'readiness to start'. Persson's 2016  
27 study of patients not on ARTs found similar barriers and concerns: for example, logistics of starting  
28 life-long medication, fear of long term side effects and desire to stay drug-free whilst healthy.(27)  
29  
30 Considering ARTs was another point at which some participants anticipated 'biographical disruption'  
31 which deterred them from starting treatment.  
32  
33  
34  
35  
36  
37  
38

39 The study's strengths are in the large number of participants at two different clinics, the inclusion of  
40 a range of people with HIV broadly similar to the cohorts seen at these clinics, and diagnosed across  
41 the four generations. The semi-structured interview format allowed us to explore factors important  
42 to participants rather than asking about pre-defined concerns. However, our study sample was  
43 imbalanced between generations, with larger numbers of women in the earliest two generation and  
44 only one of those more recently diagnosed. This means that some of our conclusions about  
45 generation may also reflect gendered differences. Our recruitment methods that relied on  
46 recruitment from the two clinics meant we were not able to explore the experiences of those who  
47 remain outside care. The study is also limited by the single interview format which meant people  
48 were having to recall past experiences, some of which were three decades ago. This may have  
49 introduced recall bias with subsequent experience colouring earlier reports; moreover, earlier  
50  
51  
52  
53  
54  
55  
56  
57

1  
2  
3 generations had more time to have disengaged and re-engaged with care. The focus of the study on  
4 a particular model of care in London limits the generalisability of our findings to other settings.  
5

6 The evolution of simpler treatments has been accompanied by a reconfiguration of the care  
7 pathway. In London, HIV clinics are increasingly narrowly focused on HIV and HIV-specific  
8 medications and clinicians are not authorised to provide more holistic medical care.(28) In practice,  
9 this has led to less frequent clinic visits, a shift to virtual “e-clinics”, and greater links with, and  
10 reliance on, general practitioners. The impact of this on the care continuum is unclear. Continuity of  
11 clinician, the atmosphere in the clinic and good communication are recognised to be key issues for  
12 patients. (29, 30)  
13

14 There is increasing recognition that viral suppression is not the final goal for people who are now  
15 living longer with HIV.(31-33) Lazarus et al (2016) have called for a ‘fourth 90’ “providing an explicit  
16 target for health- related quality of life”(31). In December2017 these concerns were embodied in  
17 policy recommendations from the European Parliament calling for an integrated and patient-centred  
18 approach to long term HIV care ensuring that services are meeting this challenge. (34) Our study  
19 illustrates that the patient journey is complex and personalised care should not be lost with  
20 streamlining pathways. All our participants were virally suppressed but that can hide the reality of  
21 their reliance on the caregivers to help maintain that stability.  
22  
23  
24  
25  
26  
27  
28  
29  
30

31 A personal, holistic approach has been a hallmark of HIV care since the beginning of the epidemic. It  
32 is important that major advances in biomedical treatment do not undermine the care continuum  
33 through a loss of care that meets the complex needs of patients, for whom HIV diagnosis and  
34 treatment remain significant challenges requiring supportive and flexible care.  
35  
36  
37  
38  
39  
40  
41  
42  
43  
44  
45  
46  
47  
48  
49  
50  
51  
52  
53  
54  
55  
56  
57



1  
2  
3  
4  
5 **Acknowledgements:** Thanks to participants for sharing their time and stories, to Jane Rowlands and  
6 Chris Higgs for conducting some of the interviews and the staff of both clinics for facilitating the  
7 study.  
8

9  
10 **Contributorship statement:** All four authors, J. Bruton, T. Rai, S. Day and H. Ward, were involved in  
11 the design of the study. J. Bruton and T. Rai completed the initial analysis and interpretation of the  
12 data and subsequent discussion and analysis was undertaken by all 4 authors through team  
13 discussion. J. Bruton completed the first draft of the manuscript. All four authors participated in  
14 critiquing and revising the draft manuscript and all approved the final draft.  
15

16 All four authors accept accountability for the submitted paper.  
17

18 **Collaborators:** J. Rowlands and C.Higgs undertook some of the interviews at one of the two study  
19 sites.  
20

21  
22 **Funders:** Funded by grants from Imperial NIHR Biomedical Research Centre, P35771, the Imperial  
23 College Healthcare Charity, P44223, and supported by the St Stephens AIDS Trust. No  
24 pharmaceutical grants were received in the development of this study.  
25

26 **Competing Interests:** There are no competing interests  
27

28 **Data sharing statement:** The interview transcripts are anonymised and stored securely at Imperial  
29 College London on a password protected database on a password protected computer. The  
30 participants were assured of the security of their data and they would remain confidential.  
31  
32  
33  
34  
35

## 36 37 38 References

- 39 1. Gardner EM, McLees MP, Steiner JF, del Rio C, Burman WJ. The Spectrum of Engagement in  
40 HIV Care and its Relevance to Test-and-Treat Strategies for Prevention of HIV Infection. *Clinical*  
41 *Infectious Diseases*. 2011;52(6):793-800.
- 42 2. UNAIDS. UNAIDS. 90-90-90 - an ambitious treatment target to help end the AIDS epidemic  
43 (accessed June 21, 2017) <http://www.unaids.org/en/resources/documents/2014/90-90-90>. 2014.
- 44 3. Kirwan PD CC, Brown AE., Gill ON., Delpech VC. and contributors. HIV in the UK: 2016 Report.  
45 London: Public Health England; 2016.
- 46 4. Flowers P, Davis MM, Larkin M, Church S, Marriott C. Understanding the impact of HIV  
47 diagnosis amongst gay men in Scotland: an interpretative phenomenological analysis. *Psychology &*  
48 *health*. 2011;26(10):1378-91.
- 49 5. Christopoulos KA, Massey AD, Lopez AM, Geng EH, Johnson MO, Pilcher CD, et al. "Taking a  
50 half day at a time:" patient perspectives and the HIV engagement in care continuum. *AIDS patient*  
51 *care and STDs*. 2013;27(4):223-30.
- 52 6. Gale NK, Heath G, Cameron E, Rashid S, Redwood S. Using the framework method for the  
53 analysis of qualitative data in multi-disciplinary health research. *BMC Medical Research*  
54 *Methodology*. 2013;13(1):117.  
55  
56  
57



- 1
- 2
- 3 7. Deeks SG, Lewin SR, Havlir DV. The End of AIDS: HIV Infection as a Chronic Disease. *Lancet*. 2013;382(9903):1525-33.
- 4
- 5 8. Yehia BR, Gebo KA, Hicks PB, Korthuis PT, Moore RD, Ridore M, et al. Structures of Care in the Clinics of the HIV Research Network. *AIDS patient care and STDs*. 2008;22(12):1007-13.
- 6
- 7 9. Ogaz D. FM, Connor N., Gill ON. and contributors. HIV testing in England:2016 report. London England: Public Health England; 2016.
- 8
- 9 10. Rayment M, Thornton A, Mandalia S, Elam G, Atkins M, Jones R, et al. HIV Testing in Non-Traditional Settings – The HINTS Study: A Multi-Centre Observational Study of Feasibility and Acceptability. *PLOS ONE*. 2012;7(6):e39530.
- 10
- 11 11. Wise J. Guidelines call for HIV testing to be “normalised”. *BMJ*. 2008;337.
- 12
- 13 12. Roth NL, Nelson MS. HIV diagnosis rituals and identity narratives. *AIDS Care*. 1997;9(2):161-80.
- 14
- 15 13. Stevens PE, Hildebrandt E. Life changing words: women's responses to being diagnosed with HIV infection. *ANS Advances in nursing science*. 2006;29(3):207-21.
- 16
- 17 14. Stevens PE, Tighe Doerr B. Trauma of discovery: women's narratives of being informed they are HIV-infected. *AIDS Care*. 1997;9(5):523-38.
- 18
- 19 15. Anderson M, Elam G, Gerver S, Solarin I, Fenton K, Easterbrook P. "It took a piece of me": initial responses to a positive HIV diagnosis by Caribbean people in the UK. *AIDS Care*. 2010;22(12):1493-8.
- 20
- 21 16. Meursing K, Sibindi F. HIV counselling — a luxury or necessity? *Health Policy and Planning*. 2000;15(1):17-23.
- 22
- 23 17. Christopoulos KA, Massey AD, Lopez AM, Hare CB, Johnson MO, Pilcher CD, et al. Patient Perspectives on the Experience of Being Newly Diagnosed with HIV in the Emergency Department/Urgent Care Clinic of a Public Hospital. *PLOS ONE*. 2013;8(8):e74199.
- 24
- 25 18. Clifton S, Nardone A, Field N, Mercer CH, Tanton C, Macdowall W, et al. HIV testing, risk perception, and behaviour in the British population. *AIDS (London, England)*. 2016;30(6):943-52.
- 26
- 27 19. Bury M. Chronic illness as biographical disruption. *Sociology of health & illness*. 1982;4(2):167-82.
- 28
- 29 20. Worthington C, Myers T. Desired elements of HIV testing services: test recipient perspectives. *AIDS patient care and STDs*. 2002;16(11):537-48.
- 30
- 31 21. Hult JR, Maurer SA, Moskowitz JT. "I'm sorry, you're positive": a qualitative study of individual experiences of testing positive for HIV. *AIDS Care*. 2009;21(2):185-8.
- 32
- 33 22. Kempf MC, McLeod J, Boehme AK, Walcott MW, Wright L, Seal P, et al. A qualitative study of the barriers and facilitators to retention-in-care among HIV-positive women in the rural southeastern United States: implications for targeted interventions. *AIDS patient care and STDs*. 2010;24(8):515-20.
- 34
- 35 23. Yehia BR, Stewart L, Momplaisir F, Mody A, Holtzman CW, Jacobs LM, et al. Barriers and facilitators to patient retention in HIV care. *BMC Infectious Diseases*. 2015;15(1):246.
- 36
- 37 24. Engelhard EA, Smit C, Van Sighem A, Reiss P, Nieuwkerk PT, Kroon FP, et al. Impact of HIV care facility characteristics on the cascade of care in HIV-infected patients in the Netherlands. *AIDS (London, England)*. 2016;30(2):301-10.
- 38
- 39 25. Newman CE. Appreciating doubts about HIV medicine2015.
- 40
- 41 26. BHIVA. British HIV Association guidelines for the treatment of HIV-1- positive adults with antiretroviral therapy. 2015 (2016 interim update) 2016.
- 42
- 43 27. Persson A, Newman CE, Mao L, de Wit J. On the Margins of Pharmaceutical Citizenship: Not Taking HIV Medication in the "Treatment Revolution" Era. *Medical anthropology quarterly*. 2016;30(3):359-77.
- 44
- 45 28. Miller R. GJ. Commissioning London's HIV Services. *Civitas (Institute for the Study of Civil Society)*; 2011.
- 46
- 47 29. Weatherburn P. KP, Reid D., Hammond G., Jessup K. My care I care: A study of what people with HIV value about NHS HIV Services across London. *Sigma Research*; 2013.
- 48
- 49
- 50
- 51
- 52
- 53
- 54
- 55
- 56
- 57

- 1  
2  
3 30. Haggerty JL, Reid RJ, Freeman GK, Starfield BH, Adair CE, McKendry R. Continuity of care: a  
4 multidisciplinary review. *BMJ: British Medical Journal*. 2003;327(7425):1219.
- 5 31. Lazarus JV, Safreed-Harmon K, Barton SE, Costagliola D, Dedes N, del Amo Valero J, et al.  
6 Beyond viral suppression of HIV – the new quality of life frontier. *BMC Medicine*. 2016;14(1):94.
- 7 32. Highlights from the BHIVA Satellite Symposium, IAS Conference, Paris, France, July 2017:  
8 ‘Tougher times: adapting to increasing demand with declining resources’. *Journal of Virus*  
9 *Eradication*. 2017;3(4):250-2.
- 10 33. Martel K CJ, Auberbach J. Looking Beyond Viral Suppression: Findings from The Well  
11 Project's User Survey on Factors Influeincing the Health, Well-being, and Quality of Life of Women  
12 Living with HIV [IAS 2017 Poster]. 2017 [Available from: <http://www.thewellproject.org/news-press/looking-beyond-viral-suppression-findings-well-project%E2%80%99s-2016-user-survey-factors>].
- 13  
14  
15 34. HIV Outcomes, Beyond Viral Suppression. Recommendations Launched at the European  
16 Parliament. 2017 [cited 03/01/2018]. [cited 03/01/2018]. Available from:  
17 [http://hivoutcomes.eu/wp-content/uploads/2017/11/HIV\\_Booklet\\_FINAL-DIGITAL-version.pdf](http://hivoutcomes.eu/wp-content/uploads/2017/11/HIV_Booklet_FINAL-DIGITAL-version.pdf).
- 18  
19  
20  
21  
22  
23  
24  
25  
26  
27  
28  
29  
30  
31  
32  
33  
34  
35  
36  
37  
38  
39  
40  
41  
42  
43  
44  
45  
46  
47  
48  
49  
50  
51  
52  
53  
54  
55  
56  
57

## Key statements

- A qualitative study understanding the patients' perspective of their experience of the HIV care continuum
- The diverse study cohort spans 4 'generations' diagnosed at different time points between 1986 and 2014 reflecting the evolution of ARTs
- There are striking similarities of experience and significance at key points on the continuum: diagnosis, engaging in care and starting treatment
- Despite advances of biomedical treatment clinical services should continue to recognise the needs of patients for whom HIV diagnosis and treatment remains a significant challenge

peer review only

## HIV patient interview topic guide

### **Overview description (recap and summary of information in the patient information sheet)**

During this project we wish to find out people's own experiences of their life with HIV starting from the beginning, before you were diagnosed and going all the way up to the present. There are some specific areas we wish to cover, however you are free to discuss what you feel are important issues or areas that have been relevant in your HIV journey.

#### **Questions:**

*[May or may not need to ask all the questions specifically, this is just a guide, some questions overlap]*

#### **1. Personal information – work/relationships/home situation**

Can you tell me a bit about yourself...

- a. What are your home circumstances?
- b. Are you in a relationship/s?
- c. Do you have dependents children? Parents? partner ?
- d. Do you work? What do you do? Benefits?

#### **2. Testing decisions**

- a. Can you tell me when you were diagnosed?
- b. How did you come to be tested?
- c. Where did you go for your test? Why?
- d. Had you had HIV tests before, if so why?
- e. What was your health like before your diagnosis?
- f. Had/did you know anybody living with HIV at the time?

#### **3. Experience of initial care**

- a. What happened when you were given your positive result?
- b. Can you remember what information you were given at the time? Was this given in the way you wanted? Please can you tell me in detail.
- c. What questions, if any, did you have for the clinical staff? Did you ask them?

- 1  
2  
3 d. Did you tell anyone / talk to anyone after you found out your results? Can you tell me a  
4 bit more about this – who were they, was it helpful to talk to them, etc.?  
5 e. Did you access information about HIV? How? where? How has this helped?  
6 f. What did you do after receiving your diagnosis?  
7 g. Which HIV clinic did you go to? Why? Are you still at that clinic? Why?  
8  
9  
10  
11

#### 12 4. Treatment decisions and research

- 13  
14 a. Are you on treatment ?  
15 b. How was the decision to start taken? Were you involved in that decision?  
16 c. What preparation did you make?  
17  
18 d. (If not on treatment) What are your thoughts about going on treatment?  
19  
20 (If on treatment) What do you think / have you any thoughts about being on treatment?  
21  
22 e. (If on treatment) How do you find taking your medication?  
23  
24 f. Have you discussed your thoughts about treatment with anyone?  
25 g. Do you know what recommendations there are for when people might start treatment?  
26  
27 h. Are you aware of the research into ARVs and treatment guidelines in the UK?  
28 i. What do you know about them? What do you think of them?  
29 j. How have they influenced your understanding of treatment?  
30 k. Have they influenced your decision to start/change/stop treatment?  
31  
32 l. Do you take part in clinical trials? Why?  
33  
34  
35  
36  
37  
38  
39  
40  
41

#### 42 5. Clinical care

- 43  
44 a. How often do you go to the clinic? Has that changed over the time you have been in the  
45 clinic? How?  
46 b. Who do you see? And for what? Doctor? Consultant? Nurse? Peer support? Health  
47 Advisor? etc  
48 c. What kind of care have you received at the clinic? Any good/bad experiences?  
49  
50 d. What do you think the role of the clinic is in your care?  
51 e. What other clinical services do you access? Where? How is your care coordinated?  
52 f. What do you think about the way in which HIV services are currently organised? Does it  
53 work for you?  
54 g. Have they changed? In what way?  
55 h. Are you aware of possible future changes in the services?  
56  
57  
58  
59  
60

1  
2  
3 **6. Primary care /Community and Social care**  
4  
5

- 6 a. Where do you go for your primary care needs? Why? What is your experience of primary  
7 care?  
8 b. How is your care coordinated between primary care and the clinic?  
9 c. Do you access any social care or voluntary services? If so what? Why?  
10 d. Do they meet your needs? If not why?  
11 e. Have you seen any changes in what is available? If so what?  
12  
13  
14  
15

16 **7. Living with HIV**  
17

- 18 a. Has having HIV affected your life? What are the most significant ways HIV has affected  
19 your life, and has that changed over time?  
20 b. Do you know others living with HIV? What impact does that have on your life?  
21 c. What kind of support have you had/needed since you were diagnosed positive? Has this  
22 changed over time?  
23  
24  
25  
26  
27

28 **8. Is there anything else you would like to say?**  
29

- 30 a. Given your experience of living with HIV, what would you say to others who have been  
31 recently diagnosed about what to expect?  
32  
33  
34  
35  
36  
37  
38  
39  
40  
41  
42  
43  
44  
45  
46  
47  
48  
49  
50  
51  
52  
53  
54  
55  
56  
57  
58  
59  
60

## COREQ (COnsolidated criteria for REporting Qualitative research) Checklist

A checklist of items that should be included in reports of qualitative research. You must report the page number in your manuscript where you consider each of the items listed in this checklist. If you have not included this information, either revise your manuscript accordingly before submitting or note N/A.

| Topic                                          | Item No. | Guide Questions/Description                                                                                                                              | Reported on Page No. |
|------------------------------------------------|----------|----------------------------------------------------------------------------------------------------------------------------------------------------------|----------------------|
| <b>Domain 1: Research team and reflexivity</b> |          |                                                                                                                                                          |                      |
| <i>Personal characteristics</i>                |          |                                                                                                                                                          |                      |
| Interviewer/facilitator                        | 1        | Which author/s conducted the interview or focus group?                                                                                                   |                      |
| Credentials                                    | 2        | What were the researcher's credentials? E.g. PhD, MD                                                                                                     |                      |
| Occupation                                     | 3        | What was their occupation at the time of the study?                                                                                                      |                      |
| Gender                                         | 4        | Was the researcher male or female?                                                                                                                       |                      |
| Experience and training                        | 5        | What experience or training did the researcher have?                                                                                                     |                      |
| <i>Relationship with participants</i>          |          |                                                                                                                                                          |                      |
| Relationship established                       | 6        | Was a relationship established prior to study commencement?                                                                                              |                      |
| Participant knowledge of the interviewer       | 7        | What did the participants know about the researcher? e.g. personal goals, reasons for doing the research                                                 |                      |
| Interviewer characteristics                    | 8        | What characteristics were reported about the interviewer/facilitator? e.g. Bias, assumptions, reasons and interests in the research topic                |                      |
| <b>Domain 2: Study design</b>                  |          |                                                                                                                                                          |                      |
| <i>Theoretical framework</i>                   |          |                                                                                                                                                          |                      |
| Methodological orientation and Theory          | 9        | What methodological orientation was stated to underpin the study? e.g. grounded theory, discourse analysis, ethnography, phenomenology, content analysis |                      |
| <i>Participant selection</i>                   |          |                                                                                                                                                          |                      |
| Sampling                                       | 10       | How were participants selected? e.g. purposive, convenience, consecutive, snowball                                                                       |                      |
| Method of approach                             | 11       | How were participants approached? e.g. face-to-face, telephone, mail, email                                                                              |                      |
| Sample size                                    | 12       | How many participants were in the study?                                                                                                                 |                      |
| Non-participation                              | 13       | How many people refused to participate or dropped out? Reasons?                                                                                          |                      |
| <i>Setting</i>                                 |          |                                                                                                                                                          |                      |
| Setting of data collection                     | 14       | Where was the data collected? e.g. home, clinic, workplace                                                                                               |                      |
| Presence of non-participants                   | 15       | Was anyone else present besides the participants and researchers?                                                                                        |                      |
| Description of sample                          | 16       | What are the important characteristics of the sample? e.g. demographic data, date                                                                        |                      |
| <i>Data collection</i>                         |          |                                                                                                                                                          |                      |
| Interview guide                                | 17       | Were questions, prompts, guides provided by the authors? Was it pilot tested?                                                                            |                      |
| Repeat interviews                              | 18       | Were repeat interviews carried out? If yes, how many?                                                                                                    |                      |
| Audio/visual recording                         | 19       | Did the research use audio or visual recording to collect the data?                                                                                      |                      |
| Field notes                                    | 20       | Were field notes made during and/or after the interview or focus group?                                                                                  |                      |
| Duration                                       | 21       | What was the duration of the interviews or focus group?                                                                                                  |                      |
| Data saturation                                | 22       | Was data saturation discussed?                                                                                                                           |                      |
| Transcripts returned                           | 23       | Were transcripts returned to participants for comment and/or                                                                                             |                      |

| Topic                                  | Item No. | Guide Questions/Description                                                                                                        | Reported on Page No. |
|----------------------------------------|----------|------------------------------------------------------------------------------------------------------------------------------------|----------------------|
|                                        |          | correction?                                                                                                                        |                      |
| <b>Domain 3: analysis and findings</b> |          |                                                                                                                                    |                      |
| <i>Data analysis</i>                   |          |                                                                                                                                    |                      |
| Number of data coders                  | 24       | How many data coders coded the data?                                                                                               |                      |
| Description of the coding tree         | 25       | Did authors provide a description of the coding tree?                                                                              |                      |
| Derivation of themes                   | 26       | Were themes identified in advance or derived from the data?                                                                        |                      |
| Software                               | 27       | What software, if applicable, was used to manage the data?                                                                         |                      |
| Participant checking                   | 28       | Did participants provide feedback on the findings?                                                                                 |                      |
| <i>Reporting</i>                       |          |                                                                                                                                    |                      |
| Quotations presented                   | 29       | Were participant quotations presented to illustrate the themes/findings?<br>Was each quotation identified? e.g. participant number |                      |
| Data and findings consistent           | 30       | Was there consistency between the data presented and the findings?                                                                 |                      |
| Clarity of major themes                | 31       | Were major themes clearly presented in the findings?                                                                               |                      |
| Clarity of minor themes                | 32       | Is there a description of diverse cases or discussion of minor themes?                                                             |                      |

Developed from: Tong A, Sainsbury P, Craig J. Consolidated criteria for reporting qualitative research (COREQ): a 32-item checklist for interviews and focus groups. *International Journal for Quality in Health Care*. 2007. Volume 19, Number 6: pp. 349 – 357

**Once you have completed this checklist, please save a copy and upload it as part of your submission. DO NOT include this checklist as part of the main manuscript document. It must be uploaded as a separate file.**
